# Supplementary material for: Wildfire-related smoke inhalation worsens cardiovascular risk in sleep disrupted rats
Source: Front Environ Health. Author manuscript; Available in PMC 2024 May 30. (PMC10726696; doi:10.3389/fenvh.2023.1166918)
Supplement: s1 [file NIHMS1941972-supplement-s1.xlsx]

## Sheet: Fig 2 day 1 transition phys
Day 1
Heart rate day 1
Time (min)	SDAP								SDFA								NSAP								NSFA
0	337.387	397.624	325.257	309.91	358.635	308.986	311.824		342.547	372.076	303.829	349.889	325.38	361.391	347.442		319.892	398.751	355.97	327.526	312.702	373.979	304.292		329.637	300.388	433.759	388.716	336.988	329.066	347.724
10	323.255	330.976	301.728	325.307	349.317	347.117	302.508		333.36	353.286	311.88	340.515	336.005	346.15	314.015		312.887	347.787	331.218	317.3	299.528	367.913	299.347		318.541	308.428	458.12	389.049	351.738	323.398	334.222
20	321.495	382.697	286.486	309.511	366.184	419.955	298.908		340.408	397.512	335.768	317.062	348.754	338.663	342.139		308.226	328.113	394.558	312.701	288.926	323.116	294.123		349.013	316.96	396.171	371.907	359.203	337.344	320.437
30	327.611	412.709	296.592	324.569	345.564	339.19	353.949		319.823	350.556	319.251	301.643	339.778	340.103	320.85		309.739	323.605	347.105	306.825	294.62	321.269	347.181		324.499	327.082	339.268	325.99	347.243	325.752	330.797
40	313.128	334.818	290.481	348.542	339.265	318.811	340.98		339.603	408.778	307.687	300.871	330.486	358.177	336.682		320.175	318.849	328.489	299.758	303.688	305.302	294.42		366.611	286.555	335.583	335.162	333.271	349.463	311.751
50	311.74	355.048	321.173	325.303	439.704	318.017	318.899		318.06	347.145	311.377	351.488	318.436	345.086	362.94		313.313	311.715	328.587	328.992	310.404	311.624	308.786		345.686	299.224	357.603	307.124	350.7	322.311	311.975
60	318.631	353.621	297.089	314.837	364.289	310.368	317.338		328.024	387.805	331.347	306.009	323.412	336.024	329.62		388.169	321.619	339.13	299.958	297.572	327.852	304.407		352.544	284.165	308.219	329.551	339	329.079	339.628
70	316.421	454.333	309.656	400.683	357.4	315.387	324.923		345.013	344.88	362.712	301.164	334.734	356.753	321.02		322.394	326.553	330.595	296.785	350.907	318.868	357.859		368.548	291.218	331.63	311.972	383.931	313.106	335.252
80	358.781	338.323	301.629	380.843	459.308	332.098	411.925		350.069	364.495	413.131	315.768	378.181	362.283	355.321		326.737	366.349	323.415	290.731	354.567	336.174	366.169		348.769	281.705	392.269	318.594	341.222	401.199	375.608
90	330.914	394.518	340.379	402.026	454.255	389.212	420.629		355.868	397.091	321.645	312.373	376.188	351.514	409.757		398.275	367.451	441.106	300.298	368.609	405.004	314.207		328.856	281.608	382.127	321.567	353.917	397.221	304.62
100	373.408	447.219	375.182	414.617	444.302	386.756	447.61		388.38	381.826	326.341	328.836	351.924	356.876	348.668		386.54	350.234	413.526	350.091	365.847	392.741	331.42		432.422	300.777	426.074	347.613	387.168	377.243	305.66
120	360.351	399.235	373.246	406.394	474.38	339.53	471.218		383.977	468.293	316.747	393.661	354.336	392.466	396.109		402.487	348.592	369.143	332.926	360.323	396.431	313.008		384.522	329.77	435.864	359.221	444.348	403.932	311.259
130	367.473	446.358	373.233	380.699	457.503	381.424	434.949		384.134	415.564	432.876	403.944	343.587	426.29	424.875		392.804	368.111	397.524	367.513	322.111	352.953	376.694		446.061	332.499	407.446	368.104	424.487	373.064	382.571
140	384.364	473.009	378.774	351.149	481.778	342.001	366.879		390.615	413.422	418.104	404.74	349.359	396.996	402.664		393.147	396.268	418.792	304.043	344.027	367.043	380.267		435.709	320.931	428.147	420.488	425.696	384.51	412.897
150	386.804	365.058	366.13	358.041	373.137	329.412	382.345		410.936	445.089	384.106	416.132	362.403	406.121	401.939		394.503	429.221	402.296	351.939	368.327	373.261	386.165		424.675	341.719	432.682	396.351	417.594	433.938	428.008
160	360.826	358.161	383.906	343.64	460.73	358.335	357.342		377.175	393.93	397.886	369.036	371.296	399.01	365.422		343.461	397.73	407.216	368.295	326.256	367.525	409.01		413.259	342.371	403.409	388.276	415.465	453.161	413.122
SBP	SDAP							SDFA							NSAP							NSFA
0	115.757	131.655	114.222	117.817	116.342	122.289	115.801	124.05	118.803	106.186	114.112	127.018	60.266*	98.401	109.91	123.433	123.688	113.17	116.405	124.663	118.344	119.583	111.315	134.318	137.755	103.084	113.901	133.051
10	113.791	104.421	111.128	120.188	117.566	128.483	108.726	110.229	119.289	109.649	120.575	121.324	61.814*	99.714	109.889	125.342	117.423	106.926	110.297	115.867	116.026	116.575	110.38	133.68	125.539	108.691	111.922	123.894
20	111.944	128.055	121.643	120.128	123.177	136.858	113.705	117.534	121.726	115.109	126.259	138.443	57.603*	111.765	111.753	120.102	134.051	109.62	110.63	111.261	117.799	122.907	119.279	123.724	121.433	115.915	112.367	122.8
30	118.055	127.515	114.695	120.259	119.33	125.908	121	107.492	115.991	116.605	118.135	126.429	57.877*	107.427	111.729	118.485	119.507	108.525	111.69	111.298	118.826	114.748	117.699	107.238	112.464	109.988	111.971	122.703
40	111.958	117.446	115.932	124.66	113.801	124.45	131.095	120.941	136.773	110.539	119.054	127.161	64.815*	94.738	123.684	117.291	112.844	108.881	115.631	109.907	116.652	133.155	113.72	105.75	112.972	109.835	124.951	121.429
50	117.579	127.23	123.461	121.35	130.85	120.206	120.36	106.447	121.47	119.397	120.057	121.708	73.667*	109.681	115.802	114.735	115.855	118.559	112.6	111.161	124.287	125.675	116.158	111.4	112.025	117.728	112.228	123.173
60	112.852	133.424	116.746	115.994	119.937	123.447	115.048	112.877	131.033	120.089	117.349	120.514	60.89*	105.427	126.177	124.56	117.659	105.471	111.187	119.92	124.396	125.375	112.296	108.514	122.239	134.508	115.131	120.432
70	117.483	133.644	129.314	124.748	126.088	121.538	121.407	122.166	124.589	127.267	118.499	143.965	64.972*	110.497	116.263	126.856	126.724	107.85	129.398	120.228	136.49	131.855	111.456	121.594	115.925	119.323	113.087	121.345
80	120.076	121.779	120.82	124.785	145.554	128.286	136.025	113.181	128.197	131.671	125.395	142.504	59.565*	110.359	118.73	123.621	122.076	113.528	129.094	123.996	141.56	140.401	120.754	127.706	120.158	115.881	125.628	141.449
90	120.631	130.759	122.188	138.085	127.534	140.178	126.589	118.251	131.505	115.945	126.246	125.47	64.564*	116.182	127.539	128.748	136.319	113.105	134.615	129.382	127.726	133.702	123.65	130.903	122.794	119.801	129.967	126.746
100	128.283	139.627	126.754	137.162	140.722	143.675	132.62	127.876	121.36	120.726	133.14	129.912	60.079*	115.046	122.957	140.256	137.485	122.259	129.768	122.664	132.982	144.837	116.408	137.453	128.94	124.111	126.847	121.684
110	124.066	128.487	127.533	138.321	129.732	128.653	127.424	123.829	142.238	121.334	130.112	129.588	67.007*	117.729	139.411	124.924	137.323	122.816	121.747	138.857	128.996	136.961	125.703	136.58	131.134	123.607	128.553	123.584
120	126.62	144.034	122.206	122.605	125.014	138.434	127.506	124.131	137.906	144.21	139.694	131.813	79.789*	131.268	139.697	130.955	126.099	121.842	120.122	137.553	131.291	127.564	129.319	131.374	122.202	129.304	117.24	134.653
130	121.287	127.879	129.569	123.093	150.74	140.707	112.981	126.761	130.723	137.912	129.173	134.065	64.087*	127.837	131.875	133.547	138.721	113.485	116.86	120.402	137.98	136.799	121.669	137.502	136.616	125.466	110.877	132.187
140	124.653	117.911	117.457	119.914	132.281	121.027	109.207	117.234	133.773	132.103	130.711	135.747	74.062*	113.838	129.406	129.237	142.083	120.833	127.315	120.41	141.659	130.345	123.33	142.672	131.063	117.792	121.72	131.444
150	116.731	114.994	125.264	124.199	147.406	120.94	128.148	116.523	122.199	127.585	127.882	128.661	72.491*	104.125	116.961	123.219	128.35	121.328	119.727	115.418	137.421	125.753	118.176	129.715	146.401	119.501	119.857	130.555
MAP	SDAP							SDFA							NSAP							NSFA
0	95.838	106.818	94.048	95.806	96.053	99.23	94.943	103.357	98.53	87.606	90.567	101.479	49.613*	83.076	92.154	103.999	101.241	94.287	92.115	102.848	94.446	97.716	91.583	113.256	116.798	85.156	94.703	111.225
10	93.741	82.269	90.442	99.258	96.914	106.531	88.913	90.923	99.072	90.564	98.222	98.848	51.522*	82.911	91.83	103.602	96.276	88.128	88.381	95.059	93.072	95.961	90.455	112.936	106.329	88.66	93.722	102.619
20	90.897	103.675	99.305	98.245	101.702	113.321	93.381	97.569	101.926	95.879	101.438	113.586	47.276*	94.599	93.833	98.695	110.611	90.527	89.529	90.773	94.359	102.242	98.901	103.708	102.181	94.426	93.855	101.374
30	97.014	105.345	93.336	99.48	99.032	102.722	100.211	88.597	95.641	95.922	94.191	101.813	47.966*	89.373	93.55	98.105	98.726	90.565	89.135	91.058	95.153	95.185	97.514	88.219	94.472	90.982	94.819	100.941
40	91.433	93.56	93.619	103.548	95.202	101.31	110.576	101.108	113.798	91.09	95.215	100.994	53.657*	78.281	104.655	96.776	93.743	89.274	92.829	89.736	93.221	110.669	93.26	86.702	94.686	91.309	104.198	100.256
50	96.441	101.605	100.04	99.467	112.322	96.822	100.544	88.757	99.951	98.301	97.236	97.102	63.139*	91.771	97.498	94.484	94.365	98.656	90.472	90.822	100.666	103.756	95.197	91.475	94.227	97.711	93.872	101.973
60	92.252	107.13	95.48	94.957	100.54	99.514	95.624	93.71	107.155	98.728	95.81	96.991	51.057*	87.394	108.489	102.908	96.626	87.643	90.487	96.754	100.711	102.967	92.23	88.385	100.919	112.597	96.977	99.63
70	94.724	109.519	105.27	103.908	107.201	97.633	101.032	101.195	101.932	107.408	94.944	114.459	53.523*	90.683	98.309	104.636	105.42	89.758	107.028	98.508	112.908	109.782	91.27	100.635	97.15	100.23	94.984	100.84
80	99.142	97.593	99.123	103.882	126.465	101.759	115.17	94.36	105.339	111.425	101.28	116.989	50.328*	91.112	100.283	103.772	101.228	93.267	107.047	101.749	116.261	116.011	99.222	107.099	99.384	96.124	105.98	117.463
90	100.354	106.689	100.957	115.072	108.87	115.791	106.943	99.66	108.053	96.94	102.569	102.944	53.319*	100.1	107.581	107.864	115.061	94.084	111.637	108.247	102.51	108.915	100.819	109.341	102.076	100.42	109.691	104.119
100	107.872	115.497	105.26	115.535	120.507	120.075	113.409	107.721	98.688	99.914	109.728	104.596	50.126*	96.503	103.662	118.162	116.211	103.146	106.515	102.963	107.681	121.485	96.181	115.394	108.881	103.369	108.095	100.89
110	104.055	105.589	106.281	115.425	110.666	103.843	108.847	104.898	119.747	100.64	108.076	104.708	56.075*	98.659	118.536	103.028	113.631	103.418	100.294	117.234	104.356	113.994	104.16	115.618	111.271	104.841	108.598	103.306
120	105.669	119.933	101.7	101.997	106.117	114.651	108.781	104.216	116.474	121.396	116.944	104.749	67.594*	111.695	118.536	110.162	105.254	102.37	98.959	114.781	108.526	107.204	106.989	110.249	103.482	109.044	100.815	113.57
130	101.138	105.303	108.576	101.488	129.53	115.748	93.324	106.662	107.905	116.235	107.523	109.193	54.502*	107.628	112.43	112.62	118.117	95.299	94.844	100.691	114.422	115.478	101.58	115.387	115.543	105.782	94.748	111.001
140	105.988	95.336	98.895	98.467	109.825	98.425	91.103	98.227	112.176	111.592	109.083	108.675	62.94*	95.219	109.648	109.59	117.692	102.229	105.675	101.644	116.432	109.405	102.014	119.755	111.778	98.873	104.614	112.285
150	97.529	93.959	104.6	102.953	125.624	100.06	106.884	97.719	100.39	107.135	105.363	104.98	62.6*	89.079	98.313	104.306	107.355	101.708	97.614	95.735	111.776	105.087	97.171	108.957	124.957	100.909	101.98	111.089
DBP	SDAP							SDFA							NSAP							NSFA
0	79.121	87.603	79.397	79.891	79.385	81.536	79.283	88.074	82.957	73.717	72.943	82.59	41.627*	70.575	78.688	87.409	83.887	79.98	74.01	84.891	77.531	81.283	76.195	94.696	100.261	71.107	80.255	93.928
10	78.092	65.426	75.58	83.869	81.309	89.408	73.403	76.769	84.231	76.441	81.681	81.244	43.484*	69.799	78.224	87.19	80.475	73.003	71.996	79.302	77.265	80.851	74.79	95.791	90.44	72.942	79.185	84.632
20	74.996	85.872	83.722	82.157	85.397	94.051	77.802	83.757	87.506	82.398	84.219	94.272	39.688*	81.395	80.433	82.942	93.673	75.553	73.75	74.659	77.822	86.904	81.658	87.423	87.763	78.138	80.111	84.647
30	81.07	86.822	77.888	84.302	83.984	84.284	83.23	75.294	80.381	79.452	77.17	82.272	40.632*	76.098	80.546	82.569	82.881	76.464	72.406	75.08	76.887	80.623	81.03	73.821	80.515	76.493	80.868	84.43
40	75.878	75.471	77.198	87.932	81.391	84.147	93.706	87.038	95.087	76.638	78.454	81.928	45.431*	65.283	90.076	81.629	79.392	74.492	75.957	73.913	76.952	93.556	78.706	72.587	81.477	77.038	87.513	83.031
50	80.36	81.984	82.219	82.633	97.059	79.29	85.67	76.188	84.015	82.391	79.318	78.747	55.382*	77.692	84.186	79.451	78.222	83.341	73.893	74.775	83.107	86.682	79.501	76.596	80.949	82.011	79.825	86.194
60	75.863	85.503	79.599	79.65	85.412	82.131	81.244	80.212	88.575	83.385	79.34	79.454	43.866*	73.557	94.674	86.699	80.93	73.554	74.763	78.837	83.319	87.235	77.504	73.618	83.991	94.206	82.124	83.631
70	77.434	90.089	86.808	89.031	91.279	80.279	85.191	87	85.142	90.719	77.658	92.592	45.627*	76.145	84.935	88.226	90.127	76.136	89.389	82.315	94.425	92.438	76.324	85.461	83.023	84.418	81.43	84.153
80	81.947	79.019	82.512	86.821	111.55	82.764	97.65	80.62	87.721	95.216	83.571	97.216	43.58*	75.954	87.256	87.291	85.657	77.133	88.592	84.239	96.921	97.656	82.75	90.839	83.897	81.078	90.949	98.221
90	84.491	88.618	84.914	96.558	91.807	96.278	90.414	85.669	89.011	82.46	84.44	82.872	44.767*	87.332	91.191	90.564	97.442	81.123	92.696	92.902	84.161	90.652	83.788	92.577	86.294	86.437	92.34	86.907
100	90.918	96.204	87.453	97.89	103.685	100.33	97.261	92.301	81.706	83.367	91.536	85.666	42.876*	82.398	87.822	101.649	98.99	88.398	88.847	85.754	89.81	104.271	80.551	97.493	93.193	85.923	92.188	85.674
110	87.529	87.286	89.378	97.326	94.436	85.572	93.899	90.417	101.427	85.649	90.627	86.013	47.814*	83.267	101.433	85.207	94.821	88.178	82.958	98.24	86.787	96.587	87.958	98.804	95.79	89.83	92.787	88.665
120	87.902	100.235	85.45	85.439	90.633	95.189	93.96	89.173	99.036	104.6	100.034	83.705	58.212*	94.825	102.198	94.038	88.854	86.489	82.24	96.956	91.254	91.071	89.798	93.412	89.419	92.445	86.82	96.698
130	85.129	86.459	91.603	85.659	112.482	95.787	77.779	90.793	89.855	99.613	90.542	89.297	47.459*	89.439	97.097	94.915	100.631	81.5	78.001	85.558	95.775	99.254	85.718	97.035	98.221	89.695	82.387	93.952
140	90.482	78.299	83.283	82.382	92.586	81.288	78.053	83.496	95.263	96.092	92.733	87.442	54.22*	81.256	94.324	93.818	98.646	87.498	87.863	85.478	97.46	93.191	84.235	100.645	96.693	84.101	90.171	96.995
150	82.812	78.008	88.461	87.032	109.665	84.199	91.006	84.092	83.16	90.773	88.589	84.077	54.943*	77.058	84.416	90.011	91.218	85.547	80.31	79.942	92.646	89.309	80.788	92.478	107.137	85.463	85.802	96.321
Activity	SDAP							SDFA							NSAP							NSFA
0	2.2	0.4	0	0.3	4.1	1.8	0.2	0.8	1.2	0	0	0.9	11.7	0.2	0.1	6.9	0.1	1.4	10	8.9	4.1	0	0.8	4	5.2	0.6	5.4	2.2
10	0	0.1	0	0	0.7	0	0	0	0.1	0	1.3	0.1	1.5	0.5	0.1	0	0.5	0.1	0	6.9	0	0.4	0	2.8	12.6	0	0	6.7
20	0.1	1	0.1	0.6	0	5.5	0.9	0	0.8	0	0.1	0.9	1.1	0	0	0	0	0	0.3	2	0.1	0	2.1	6.9	2.9	0	1.5	0
30	0	0.9	0.3	0	1.5	4.4	1.9	0.5	4.1	0	0	9.2	0.9	8.4	0	1.4	1.3	0	0.4	1.3	0	2.2	5.2	2.1	2.7	0	0	0
40	0.3	2.2	0	0.2	0.8	0	8.8	0.7	7.2	0	0	1.9	0.2	0.6	0	0	0	0.7	0.1	1.1	0	0.9	0.9	0	0.3	0.4	0	0
50	0.1	0.1	0.2	0	0.8	1.8	0	0	1.2	0	0.2	0.1	0.6	0	0.6	0.1	0	0.1	0.1	0	0	9.2	0	0	1.8	0.4	3.8	0.2
60	0.1	0.7	0.8	0.4	4.2	0.2	0	0	0.9	0.1	0.1	0.6	4.6	0	2.4	0	1.3	0	0.1	0	0.1	2.3	0.1	0.2	0	7.6	0.6	0.2
70	0.1	0	0	0	1.7	0.6	0	0.9	2.7	0	2	0.9	0.2	0	3.8	0.7	0.2	0.3	1.6	0.2	0	0.3	0	0	0	13.9	1.1	0.7
80	0.3	1.4	0.1	0.4	0.6	0	3.1	0	0	5.6	0.1	1.9	0	0.1	0.3	9.3	0.2	0	15.7	0	6.6	0.6	2.1	1	0.2	4	0.9	3.9
90	5.1	0	0	14.9	4.3	5.6	10.3	0.8	0	3.3	1.6	7.2	0.6	0	0.2	0	0.2	0.9	7.3	0	8.4	0	0.5	0.9	0.6	0.3	11.5	5.5
100	0.9	4.4	3	5.2	14.6	8.7	13.2	4.5	0.1	0.7	1.8	5.7	1.3	1.3	7.9	10.3	13.4	0	18.8	7.3	0.7	0.9	0.1	4.1	0.1	0.9	6.5	0.6
110	4	5.3	8.4	4.7	3.2	5	11.2	6	5.4	0	2.7	1.4	2.1	1	16.2	1.2	18.8	0.6	9.8	17.1	0	2.7	0.2	4.4	1.5	10.4	3.4	0.3
120	14.4	17.4	5.4	15.3	6.8	19.7	10.3	2.5	8.2	3.2	5.1	8.5	1.6	3.4	3.5	9.4	16.5	2.2	1.1	6.6	0	14.7	5.1	7.5	0	11.5	12.3	2.9
130	26.9	5.8	11.5	2.7	5.4	9.5	8.2	13.8	2.5	8.2	4.4	0.1	8.6	12.3	0.9	3.3	25.9	0.6	2.6	3.8	7.5	8.4	8.3	1.1	3.7	14.5	3.7	0.9
140	19.5	3.1	21.2	0	3.1	4.8	0	9.9	10.2	4.8	6.3	0.1	10.4	7	4.5	11.6	16.8	1.5	9.2	19.3	4.4	8.1	2.8	8.9	4.8	8.8	0	15.4
150	8	0.8	6.3	0.1	0	0	0.7	9.3	2	5.8	3.8	0	5.9	9.6	7.8	9.1	7.2	0.6	0	21.3	6.9	8.4	8.8	4.8	1.8	17	8.1	7.7

## Sheet: Fig 3 day 1 hrv time domain
Day 1 transition HRV
Panel A-SDNN
Time (min)	NSFA								NSAP								SDFA								SDAP
0	4.6	3.33	14.21		5.61	2.07	3.37		4.18	2.62	3.4	4.4	10.16	2.81	18.81		5.02	2.63	2.93	8.03	4.84	6.33	3.5		5.35	6.39	13.71	5.64	6.05	8.17	1.28
10	20.64	5.23	12.45	6.44	6.59	2.76	2.51		2.72	7.24	9.99	4.53	10.84	16.5	5.72		11.03	4.33	4.1	14.33	7.56	8.74	5.88		5.77	15.54	14.39	4.34	9.63	12.75	3.25
20	13.5	2.55	11.43	7.37	2.33	12.11	8.1		11.57	13.82	7.26	5.28	6.25	14.26	8.78		4.07	4.12	3.69	6.56	3.41	3.6	7.95		5.9	3.42	4.09	4.39	2.52	7.47	1.83
30	15	5.8	4.38	10.42	11.87	3.85	2.52		4.22	8.75	4.47	2.68	12.62	9.87	8.54		7.51	6.4	3.86	9.76	12.62	4.61	5.1		12.49	2.93	21.24	16.8	4.98	5.81	9.79
40	2.89		16.47	4.88	3.58	2.39	6.55		4.35	14.05	3.36	7.9	18.39		8.53		3.09	14.71	6.06	2.84	3	9.53	6.35		10	23.64	17.34	9.8	8.02	8.93	7.12
50	13.69	21.15	12.67	12.7	3.32	6.59	2.3		1.6	6.29	9.18	13.01	5.96	9.01	9.62		7.09	1.48	9.36	4.7	1.89	8.14	26.1078		8.74	6.64	10.63	11.56	11.05	15.64	12.79
60	12.44	9.89	6.14	4.29	11.57	9.5	7.81		8.32	3.94	5.85	10.22	2.11	10.37	7.03		10.63	11.42	14.08	19.51	9.38	3.44	18.48		10.95	2.52	9	3.51	3.21	9.65	19.7278
Panel B-RMSSD
Time (min)	NSFA								NSAP								SDFA								SDAP
0	4.47	2.83	16.39		2.4	2.54	4.2		1.64	3.46	3.23	4.77	6.81	4.01	19.01		3.08	1.17	3.06	4.73	2.49	4.61	4.64		6.61	1.94	14.12	3.77	10.32	4.54	1.64
10	19.27	3.27	13.55	2.11	3.68	2.69	2.87		1.42	3.76	3.03	3.29	4.66	5.2	3.99		6.66	2.06	2.77	16.98	2.5	2.96	5.18		6.19	5.56	3.85	5.31	3.38	6.69	2.83
20	6.03	3.85	10.05	2.36	2.67	10.67	2.27		2.76	2.91	3.92	4.46	3.07	17.03	9.43		2.1	1.32	2.6	6.53	2.11	3.46	7.62		5.63	1.33	3.69	3.59	3.26	5.57	2.52
30	18.36	3.47	3.1	5.57	12.3	2.13	2.93		3.83	2.69	4.4	3.61	1.61	9.8	8.31		2.17	1.37	1.36	6.47	8.34	2.33	4.62		9.95	1.78	27.18	17.9	3.14	8.91	12.89
40	3.41		14.67	7.03	2.32	2.57	2.74		4.99	8.5	2.98	8.72	25.4		3.72		3.54	5.73	1.91	1.79	1.56	5.1	6.62		10.79	30.06	17.31	9.93	2.57	6.39	1.99
50	8.81	27.39	11.08	7.42	2.12	2.45	1.19		1.19	5.79	2.62	7.46	3.39	7.81	7.97		3.11	1.41	1.88	2.89	1.67	6.01	36.664		8.07	6.81	12.65	14.3	6.64	14.47	16.78
60	14.49	10.36	7.13	2.05	11.57	2.87	11.28		4	3.18	2.62	6.81	2.83	7.29	5.9		3.52	4.06	2.35	21.95	1.94	2.39	22.16		13.53	1.28	12.09	4.12	2.45	11.85	19.1398
Panel C- pNN50
Time (min)	NSFA								NSAP								SDFA								SDAP
0	0.96	0	6.21		0	0	0		0.68	0.96	0.65	2.35	17.33	0	7.64		1.96	0	0	2.97	0	4.06	6.62		12.54	0.31	4.33	1.8	36.55	5.16	0
10	2.41	1.54	23.31	0	0.73	0.35	0		0	1.23	0	0.91	6.71	7.17	1.28		20.71	0	0.31	2.9	0	0.78	8.87		15.09	1.91	0.58	6.46	0.64	13.6	1.25
20	0.61	0	3.73	0	0	1.71	0		1.68	0	1.71	2.34	1.82	6.17	1.57		0	0	0.6	0.99	1.11	0	2.03		5.25	0	1.12	0	0.34	1.12	0
30	3	0	0	9.32	8.27	0	0		3.37	0.3	3.41	0.68	0	6.18	26.79		0	0	0	0.95	1.75	0	6.57		3.98	0	13.97	6.94	0.66	32.64	0.57
40	0		3.45	15.26	0.64	0	0		7.69	2.32	0.27	5.15	9.07		2.15		2.16	1.42	0	0	0	0.76	3.43		2.9	14.81	6.23	6.04	0.33	5.21	0
50	5.86	4.86	3.19	3.45	0	0	0		0	2.05	0.29	1.95	1.62	3.41	1.5		0	0	0	0.3	0	0.54	24.09		3.59	2.07	3.72	8.89	0.6	5.92	6.13
60	0.67	2.84	1.35	0.28	4.02	0.62	1.79		2.73	0.53	0.56	4.91	0	0.86	1.05		3.62	0.56	0	7.82	0	0.66	16.62		2.39	0	5.58	1.21	0	3.21	11.32

## Sheet: Fig 4 day 8 handling
Day 8 Handling
Panel A-Heart rate
	SDAP								SDFA								NSAP								NSFA
0	270.991	317.327	316.8	306.828	299.571	279.193	272.695		284.37	284.14	270.42	280.071	290.584	292.893	273.927		296.771	283.643	289.518	286.623	263.31	267.541	272.961		282.332	269.799	278.269	310.221	277.793	298.168	271.788
10	303.152	354.946	404.703	336.82	327.164	334.612	355.63		324.596	361.021	281.219	335.99	326.824	320.57	356.999		273.469	294.276	270.898	285.028	262.367	258.467	258.572		286.817	253.564	283.047	319.131	344.648	347.121	293.497
20	340.858	327.126	312.34	282.783	380.618	426.538	383.555		305.693	303.889	244.122	302.379	334.358	336.101	322.696		277.744	272.326	290.855	282.21	278.429	259.816	270.111		276.233	265.645	300.368	305.835	347.338	340.121	293.184
30	285.609	299.728	295.789	273.508	368.906	341.126	283.923		282.677	284.133	250.221	290.514	280.806	357.42	350.466		302.201	286.913	281.452	295.141	287.448	275.332	277.004		282.994	282.157	308.839	298.006	340.404	335.269	295.368
40	321.029	361.106	357.807	344.006	371.602	316.52	338.803		340.014	298.577	263.011	343.9	287.163	311.468	339.992		298.904	297.25	278.664	277.317	262.004	277.408	288.54		295.908	288.527	290.606	300.86	369.921	357.618	298.382
50	325.081	364.574	290.037	351.183	386.786	373.951	377.421		340.514	274.621	246.139	331.651	290.896	322.314	323.552		289.605	284.021	274.929	272.167	273.241	272.897	253.24		290.403	252.444	310.423	301.957	341.617	342.755	288.306
60	319.731	361.698	316.346	352.231	379.919	411.849	350.331		403.574	317.255	240.855	336.92	289.824	312.578	322.112		282.002	294.976	297.602	278.353	265.067	277.041	260.809		302.924	254.158	273.351	290.104	370.961	335.875	299.71
70	347.789	335.272	365.795	371.73	402.017	354.125	385.826		364.635	283.243	246.131	279.402	286.777	344.834	309.34		335.004	279.73	274.67	276.923	262.937	279.852	278.412		276.372	333.836	306.42	304.805	382.648	309.064	282.249
80	329.017	360.499	287.366	322.802	394.549	284.879	310.713		368.188	276.822	235.481	277.872	283.463	304.09	390.391		256.037	274.566	276.613	282.094	257.003	283.115	343.309		294.251	362.212	328.386	303.545	339.869	301.71	285.834
90	336.941	352.954	310.286	306.945	428.424	287.939	295.943		339.619	278.731	263.416	305.691	283.999	357.864	341.636		283.545	282.53	275.871	269.661	268.238	271.167	382.899		273.865	269.972	294.039	336.541	310.184	301.508	322.608
100	337.147	365.964	310.064	365.24	404.483	283.504	301.644		357.431	274.373	249.927	281.665	289.568	313.399	355.952		269.573	294.759	276.118	297.957	307.353	272.858	370.346		321.789	293.777	276.136	308.08	324.032	310.072	293.134
110	316.969	372.396	322.304	283.835	325.316	273.581	292.744		378.881	315.589	248.437	295.603	293.441	319.405	353.589		257.7	284.598	351.285	330.64	281.444	333.479	352.516		338.736	303.573	285.968	304.631	305.003	296.447	298.027
120	293.253	394.671	335.937	288.471	302.406	269.622	296.067		317.189	259.199	246.141	272.585	295.133	299.829	295.042		261.725	280.815	352.645	334.596	252.358	364.263	363.269		355.299	255.433	357.654	299.941	303.481	327.77	288.873
130	328.649	357.933	383.139	285.518	350.865	293.156	342.453		343.742	339.99	321.017	266.022	301.285	305.274	275.051		288.512	290.43	369.697	324.147	309.054	339.369	350.159		367.746	274.102	360.525	339.48	329.732	302.64	280.811
140	286.04	378.523	301.396	327.092	316.148	272.402	340.886		336.841	346.856	257.148	281.96	276.833	335.77	291.449		277.558	307.863	356.609	329.133	335.711	307.913	282.166		331.17	280.83	286.124	325.862	347.413	298.382	287.352
150	283.888	357.023	283.815	297.326	295.971	278.067	359.202		327.833	358.912	242.073	267.628	312.626	344.533	282.625		273.818	307.418	299.611	302.786	363.259	289.918	266.238		323.075	262.241	306.556	273.932	351.071	291.554	283.355
160	320.199	360.594	282.647	295.117	334.239	302.184	346.355		386.201	305.117	247.311	271.78	327.022	355.042	294.379		279.317	341.618	309.591	320.344	329.581	288.211	308.109		293.02	293.396	349.327	301.794	317.737	290.391	279.07
170	271.816	360.75	282.009	295.566	313.41	281.619	297.035		293.423	305.28	244.487	274.131	334.153	366.684	277.806		334.262	323.985	288.984	317.907	282.356	278.881	276.066		282.586	274.772	370.92	305.109	317.327	296.11	276.762
180	306.517	322.785	286.113	317.895	311.318	282.348	283.441		293.877	287.833	269.715	295.96	303.792	330.534	285.965		348.207	295.924	304.525	290.64	278.926	276.74	271.038		286.594	261.611	398.748	327.786	334.578	294.217	285.121
190	282.877	304.456	294.301	287.567	311.997	372.565	296.132		285.532	283.881	251.662	284.017	302.761	318.104	261.749		358.834	270.655	283.699	318.125	282.052	274.435	261.136		286.584	264.167	400.763	289.148	294.751	311.623	285.124
200	294.723	316.894	287.847	300.045	311.126	287.087	305.255		297.877	275.614	237.672	269.838	307.904	328.183	305.122		347.059	271.25	321.346	283.417	288.076	286.085	271.484		283.712	265.78	402.685	302.888	301.799	305.876	295.299
210	275.383	307.955	304.725	287.779	316.896	283.232	321.948		285.208	292.431	255.651	270.3	302.44	325.726	284.446		298.915	272.29	278.256	281.255	291.486	278.196	277.12		301.553	273.062	399.245	310.511	306.05	308.684	340.642
220	272.513	341.932	275.962	279.896	304.141	280.69	297.116		282.243	285.698	303.175	271.894	287.926	321.481	267.584		297.238	275.751	278.688	284.932	284.145	280.359	290.769		301.069	272.378	394.826	342.926	324.311	303.705	298.849
230	276.342	315.617	274.616	280.632	289.247	271.44	291.372		295.874	278.581	291.702	281.612	291.927	308.78	266.652		289.584	263.804	282.492	286.322	273.253	300.462	289.073		275.975	259.26	400.328	304.091	322.709	295.795	300.77
240	305.338	303.633	276.451	277.621	291.493	268.027	297.46		317.923	277.038	341.991	311.714	290.176	314.152	262.123		287.728	278.497	273.216	279.779	280.091	286.443	269.356		269.142	263.08	411.382	314.109	295.051	310.428	300.983
250	272.407	345.37	268.549	294.042	290.402	305.673	294.746		285.956	312.033	306.735	273.639	295.058	299.62	261.792		313.438	277.466	282.316	289.421	282.379	281.551	280.736		286.354	254.159	382.593	303.004	322.528	303.3	299.234
260	294.191	308.265	277.56	310.027	315.982	307.147	315.774		284.757	268.666	265.223	278.563	286.618	294.353	275.637		285.91	306.601	268.817	287.325	285.124	285.17	277.75		279.444	253.781	317.391	324.285	332.307	299.367	292.948
270	288.916	309.22	295.905	278.828	297.073	307.23	295.552		279.187	284.804	262.545	312.117	287.466	319.994	267.622		281.754	270.725	277.014	291.084	277.726	280.806	308.491		286.925	244.736	284.88	328.251	317.487	302.407	285.349
280	308.423	298.695	272.152	292.046	312.804	289.222	344.672		293.669	271.871	263.697	277.333	289.034	305.068	311.72		308.455	310.101	273.055	330.204	286.282	286.467	268.627		283.106	261.653	314.809	298.497	332.962	303.966	301.143
290	295.917	311.903	289.972	307.46	289.572	273.47	295.174		286.099	281.953	280.811	266.009	282.724	304.58	278.595		280.581	286.956	278.525	288.261	286.219	280.011	258.971		275.602	252.77	333.976	327.077	323.507	307.481	293.333
300	298.253	335.1	278.263	297.832	292.034	279.014	287.368		282.95	330.312	286.242	279.18	296.309	301.364	274.133		307.636	275.551	335.62	269.825	290.904	308.641	257.252		286.945	255.909	294.426	368.758	306.17	305.799	293.212
Panel B-Systolic BP
	SDAP								SDFA								SDFA								NSAP
0	114.965	130.025	118.881	122.567	111.033	122.179	119.171		118.653	124.552	121.534	116.841	138.198	18.451*	114.243		112.764	116.173	121.122	109.813	124.121	117.946	124.804		120.673	127.261	128.505	142.999	120.912	117.693	120.675
10	129.273	142.36	139.024	132.939	133.69	144.011	129.9		129.266	134.997	123.942	138.36	146.58	16.775*	130.593		117.315	119.388	119.637	112.134	127.358	116.775	125.105		141.936	118.663	118.561	136.283	127.801	132.407	126.275
20	142.807	136.273	125.225	116.961	123.055	151.566	142.162		126.837	128.469	115.896	123.149	143.173	18.566*	133.713		118.64	122.135	128.193	113.463	128.492	115.779	134.325		115.277	132.015	124.239	124.957	126.02	125.856	122.172
30	118.174	131.098	118.843	113.157	125.504	140.129	117.971		118.032	117.229	112.229	121.318	131.378	11.931*	126.862		121.974	132.881	121.502	111.173	121.446	115.435	127.156		125.168	119.715	126.443	126.914	128.563	137.63	121.727
40	136.148	149.567	128.197	132.85	130.703	140.042	142.957		134.41	126.071	120.912	133.173	137.709	16.146*	129.655		124.99	131.075	112.721	116.402	115.077	120.818	130.4		121.157	124.714	118.509	131.101	139.836	129.682	125.204
50	128.603	148.444	113.119	134.277	133.585	153.217	133.81		138.84	119.288	113.965	126.224	154.276	17.21*	118.923		128.552	118.77	111.13	117.442	120.813	111.539	123.585		120	124.814	129.679	129.093	124.263	126.29	134.566
60	124.375	145.183	122.447	130.666	134.748	144.515	128.854		148.964	133.349	113.15	124.51	148.853	20.122*	125.396		123.276	121.514	115.531	118.964	124.784	121.595	130.309		127.447	121.199	114.935	132.432	128.365	121.175	118.191
70	139.163	156.948	130.465	135.635	128.674	144.939	137.636		136.483	122.242	120.358	115.028	133.82	14.34*	127.845		125.668	112.136	127.87	116.95	119.34	112.132	133.593		119.865	133.198	129.27	130.039	124.296	117.693	127.404
80	132.129	144.375	112.2	123.384	132.229	125.531	123.091		134.078	120.58	116.732	118.318	128.351	17.732*	130.24		113.875	113.229	115.929	118.64	124.24	121.172	146.065		124.386	140.126	125.876	124.582	117.296	110.438	120.024
90	126.877	129.547	115.83	121.071	126.514	121.246	118.48		128.418	124.982	130.865	130.8	132.264	17.661*	128.454		134.134	121.005	115.92	112.248	115.6	112.91	144.815		122.968	121.293	117.876	146.322	110.585	109.942	138.383
100	135.652	143.776	121.718	137.769	125.446	126.765	116.067		139.144	119.824	116.904	118.846	139.433	16.815*	130.611		117.662	120.936	118.579	117.377	133.673	125.327	143.216		125.875	121.512	113.052	133.077	100.585	110.711	117.065
110	133.877	147.396	130.083	119.039	122.077	118.079	115.603		138.797	138.799	123.001	128.971	141.418	19.712*	128.203		117.986	116.936	136.836	135.73	127.015	134.162	137.117		140.29	121.484	120.625	129.872	117.616	116.9	118.666
120	120.28	149.326	124.673	115.697	118.731	116.204	110.901		122.329	123.52	119.056	111.074	133.689	16.721*	115.849		117.065	114.951	140.15	132.561	118.315	141.26	142.159		147.021	118.774	135.279	130.81	109.996	121.19	130.545
130	138.186	150.499	129.374	116.621	123.306	134.259	135.152		135.348	145.331	137.944	119.897	136.774	17.599*	106.861		112.901	120.208	143.985	137.646	136.166	138.448	126.185		141.568	119.857	142.408	135.911	129.209	116.345	121.967
140	119.66	144.33	123.705	136.633	118.744	118.935	131.518		134.4	139.659	118.811	124.11	133.687	19.073*	119.561		123.64	125.616	134.133	129.202	144.886	121.982	119.554		133.18	121.141	115.683	136.013	140.776	116.703	142.96
150	111.168	139.483	117.249	120.117	130.687	125.136	129.829		131.237	143.014	119.082	124.796	139.743	12.829*	109.1		122.437	140.054	119.659	118.997	139.571	120.657	114.505		124.693	120.283	130.957	125.678	125.382	111.187	123.348
160	124.785	146.356	119.165	121.719	126.88	136.472	135.161		135.284	130.302	114.224	118.837	145.606	26.558*	118.108		131.831	134.805	118.198	122.085	138.97	114.701	138.799		122.603	117.38	133.608	130.953	116.742	113.043	124.602
170	124.69	134.601	113.785	120.475	128.603	125.478	114.135		125.997	125.565	114.387	121.179	140.275	23.104*	112.014		140.771	133.472	115.167	124.95	125.186	108.064	131.001		106.764	126.797	137.609	130.001	111.772	116.97	120.978
180	126.549	131.232	114.043	122.644	108.971	122.89	113.973		118.01	119.003	117.542	127.793	141.393	17.823*	116.425		128.792	127.139	135.103	114.362	120.541	113.081	121.083		111.849	120.188	139.38	144.314	112.063	114.836	120.759
190	121.129	125.764	127.093	119.5	127.699	146.178	116.277		119.3	123.844	116.479	136.798	135.985	16.054*	109.427		134.02	116.72	109.671	119.968	115.556	111.423	121.69		110.577	125.629	138.517	132.738	104.457	111.271	122.98
200	124.348	126.721	107.819	122.181	117.322	125.1	124.909		123.56	122.333	114.959	116.54	136.297	15.693*	121.642		138.389	119.138	127.485	109.275	116.182	125.317	135.999		111.896	123.751	134.549	131.535	103.017	120.563	133.885
210	112.275	128.978	113.58	119.016	127.584	118.992	121.197		129.142	126.163	115.362	121.014	140.409	17.063*	115.091		119.594	115.794	116.66	113.329	123.941	113.997	124.579		135.125	124.711	140.997	135.812	102.818	114.614	132.279
220	121.104	127.434	110.759	120.776	118.183	133.601	126.695		123.324	121.876	131.367	120.371	142.615	14.347*	113.977		113.353	111.185	113.133	114.858	118.518	114.151	135.491		135.961	129.867	140.312	127.888	111.6	123.454	124.337
230	119.609	132.734	108.627	114.632	114.591	121.973	125.442		135.232	116.694	127.457	116.482	132.709	15.451*	112.056		116.066	115.429	121.809	115.024	121.253	118.451	129.52		120.098	116.02	130.726	135.715	114.579	116.957	124.569
240	118.253	129.152	113.135	115.209	111.052	118.619	130.069		137.499	123.706	138.465	134.297	132.31	18.642*	108.953		112.924	117.062	112.896	113.625	120.027	125.261	139.766		113.066	116.316	132.108	138.109	112.102	116.458	125.407
250	112.131	130.632	118.07	120.545	116.997	135.092	124.066		124.251	131.048	126.19	122.776	145.368	16.301*	110.207		138.638	116.804	133.548	118.206	124.355	114.539	129.805		131.586	120.108	133.995	126.284	110.63	118.207	119.07
260	116.218	138.755	114.504	128.559	114.988	125.679	120.627		124.308	118.774	118.734	118.122	141.068	15.65*	114.416		119.016	119.782	111.238	122.156	129.825	126.416	135.844		120.539	123.934	124.289	143.088	124.529	115.88	124.55
270	117.155	141.241	125.467	114.728	125.678	134.355	113.507		128.811	123.088	116.881	141.222	143.162	17.204*	109.798		120.912	114.856	117.234	121.035	125.631	118.071	134.055		126.29	116.295	112.151	135.727	117.362	112.228	120.64
280	117.51	128.149	115.858	119.578	115.147	130.779	125.158		126.586	121.118	120.284	132.781	135.878	15.693*	113.987		135.936	125.75	114.852	134.08	129.226	117.043	130.92		128.322	115.633	126.95	128.302	118.264	111.748	124.576
290	110.941	132.515	126.826	128.351	113.283	121.005	119.177		126.716	121.911	112.834	123.364	136.906	17.79*	114.054		119.684	118.685	122.934	115.98	124.199	118.221	118.794		119.422	114.779	122.059	134.372	112.692	112	118.814
300	107.83	138.261	112.501	123.887	120.289	124.594	112.681		120.051	131.303	112.456	126.35	138.712	20.961*	113.423		111.406	116.091	123.196	113.216	131.05	116.518	123.102		116.135	118.857	117.017	149.356	110.156	109.47	116.097
Panel C-Diastolic BP
	SDAP								SDFA								SDFA								NSAP
0	79.181	82.265	81.578	84.628	75.708	83.199	80.633		82.482	82.271	86.162	79.825	86.093	13.968*	81.223		82.649	79.94	84.083	78.584	80.461	78.667	82.41		82.458	86.956	89.041	99.292	85.366	85.587	84.333
10	94.075	92.013	97.846	91.116	92.614	94.909	92.054		91.599	94.65	89.917	99.534	95.373	11.447*	93.377		83.854	83.6	82.65	81.047	86.856	78.161	85.09		96.124	81.434	83.456	97.659	90.944	93.104	86.536
20	99.898	88.487	86.778	80.194	85.375	108.015	101.16		86.655	85.775	83.198	85.327	93.451	15.13*	95.34		85.918	82.833	91.77	79.055	86.525	79.366	88.404		76.568	89.498	86.589	90.529	89.503	88.953	86.013
30	78.77	87.026	81.3	77.498	86.955	96.544	78.848		81.783	80.12	81.757	80.832	83.554	9.082*	88.259		86.978	95.309	84.214	79.036	79.431	79.33	81.503		82.392	83.065	88.417	89.17	92.325	96.965	85.107
40	95.167	103.098	87.803	92.78	93.804	94.663	103.142		94.969	86.078	86.061	94.197	85.7	10.291*	91.28		87.224	92.734	77.235	81.09	74.504	80.479	85.037		80.009	85.847	81.707	90.829	97.822	91.383	84.745
50	88.956	100.453	76.421	96.182	95.145	104.488	92.18		94.536	82.301	81.978	90.483	101.178	13.135*	84.418		90.046	84.051	76.24	81.765	79.34	75.887	81.065		81.3	85.924	92.442	89.794	87.984	88.488	93.181
60	84.975	98.419	85.573	87.981	93.814	100.586	87.275		105.484	88.166	81.037	90.792	96.581	15.944*	91.687		89.283	86.469	80.641	84.267	79.152	82.581	87.251		85.216	84.022	78.84	93.344	90.732	83.97	81.352
70	97.452	106.517	91.898	94.199	90.025	98.553	97.451		94.863	82.162	84.282	79.359	83.953	8.454001*	91.633		91.48	78.572	92.403	80.127	79.887	72.536	89.766		79.14	91.01	89.537	89.665	88.935	81.717	86.921
80	91.079	94.816	76.411	84.234	94.104	81.876	80.344		90.625	82.882	82.83	80.066	82.615	12.709*	94.728		79.179	78.672	81.661	81.692	80.554	80.59	99.951		84.747	100.762	90.56	90.207	85.542	77.599	83.513
90	87.245	83.233	79.553	82.254	88.957	79.104	83.363		88.016	85.289	94.828	90.978	84.704	13.402*	91.444		94.172	83.935	80.356	79.559	74.18	77.638	98.31		81.639	82.845	80.743	102.215	78.195	75.242	97.353
100	93.405	97.278	84.851	95.568	89.004	81.499	79.779		94.924	81.466	83.966	82.798	90.562	12.419*	94.503		83.634	83.598	83.285	83.866	92.157	87.741	97.498		85.764	86.68	78.748	93.673	70.589	78.882	83.177
110	92.275	101.751	90.409	80.873	85.069	77.483	82.022		93.586	95.297	88.031	92.359	92.184	14.484*	92.917		83.445	81.778	95.208	97.969	83.696	92.857	92.983		95.706	84.385	84.442	90.938	83.305	81.527	81.669
120	79.861	101.871	84.082	79.215	79.734	76.066	76.135		81.157	85.106	85.662	77.192	86.206	11.445*	81.743		83.043	77.36	94.964	93.764	78.111	100.286	99.554		99.69	82.762	95.509	92.03	80.283	87.203	92.46
130	95.644	103.271	92.206	78.237	84.544	90.06	96.088		93.875	101.028	101.42	84.52	89.326	13.43*	74.648		76.567	83.665	98.95	100.09	90.138	96.305	86.749		97.965	82.121	105.066	95.926	92.896	82.098	85.643
140	79.686	96.608	83.016	92.875	81.891	78.309	92.615		93.25	94.248	83.789	88.674	84.528	14.749*	85.554		88.882	87.784	90.372	93.111	98.213	79.886	81.004		90.919	84.734	77.63	96.226	101.3	81.445	99.246
150	76.135	91.3	79.168	82.46	88.372	82.515	92.225		89.314	100.26	85.227	87.084	93.177	7.759*	77.566		84.359	98.118	82.095	81.634	93.717	80.79	76.448		83.482	84.498	94.485	89.599	86.344	78.059	87.845
160	86.658	97.582	81.462	84.222	86.578	91.683	94.067		93.338	87.062	81.453	82.832	95.685	20.261*	82.387		90.668	95.577	84.488	87.782	91.937	77.954	95.365		81.401	83.304	95.54	91.226	80.73	77.848	87.532
170	86.27	84.809	77.812	78.089	85.961	83.222	76.747		83.351	84.531	81.624	84.224	91.9	16.123*	77.86		101.358	91.006	79.52	89.663	82.231	73.398	87.816		69.922	89.573	99.717	94.3	77.043	80.739	83.638
180	82.748	86.727	77.777	83.944	72.6	83.306	78.296		79.103	81.099	84.842	92.426	89.96	14.898*	80.506		90.312	85.59	95.345	83.267	79.513	75.577	81.623		76.799	83.699	99.508	102.673	76.958	80.482	87.085
190	81.661	81.624	88.085	82.671	85.944	102.518	80.501		81.243	85.775	83.61	97.359	88.214	11.008*	76.365		96.06	77.874	76.208	86.414	75.98	74.934	80.969		72.86	88.736	100.019	93.221	72.608	81.445	87.455
200	83.02	81.325	72.949	80.108	78.788	81.234	87.598		83.65	83.548	81.894	80.344	87.18	10.038*	83.262		99.259	81.153	92.273	74.438	75.198	88.426	87.475		73.971	87.59	96.178	90.933	71.68	84.039	94.935
210	74.69	80.521	76.147	79.755	87.738	79.232	80.188		89.743	85.782	82.534	83.645	90.013	13.041*	78.905		82.637	78.79	80.812	76.274	80.989	77.604	80.641		90.747	88.345	101.663	97.936	73.204	82.476	96.073
220	80.799	83.04	75.093	83.815	78.5	86.343	84.811		82.342	82.502	94.907	84.198	91.417	11.615*	78.378		78.394	76.586	78.673	80.437	75.554	77.912	86.562		93.121	91.194	100.935	87.072	79.087	89.418	87.694
230	77.218	84.837	73.406	79.227	78.113	79.693	85.592		93.321	78.048	92.442	82.384	85.495	10.283*	76.999		82.688	78.346	85.795	79.063	78.921	81.351	86.277		80.123	79.653	91.684	95.284	81.279	83.037	88.648
240	81.142	81.216	76.417	79.065	76.07	77.951	87.979		91.9	83.331	97.655	97.591	83.831	14.952*	73.655		79.414	81.156	80.629	78.814	78.341	86.186	90.14		75.057	82.324	94.561	97.837	77.614	83.578	90.683
250	76.933	84.471	80.29	83.652	80.108	90.187	86.435		84.946	89.472	90.622	87.862	94.088	11.798*	77.103		99.134	80.757	94.659	82.659	84.413	77.928	86.551		88.579	82.547	96.779	92.773	77.846	82.828	85.568
260	72.231	93.708	77.217	87.93	78.505	80.965	82.136		86.088	81.89	84.863	83.408	89.664	11.131*	78.808		84.491	83.228	78.498	81.915	84.737	87.198	92.801		81.966	83.736	83.959	102.725	89.359	82.802	82.981
270	78.47	92.741	83.224	78.698	86.51	88.052	72.962		85.218	83.789	82.681	101.949	91.11	14.042*	76.122		86.344	78.9	81.693	83.732	83.282	82.188	89.194		87.519	79.803	75.878	97.813	81.981	80.494	86.098
280	80.466	80.551	79.377	83.662	79.1	87.759	85.828		87.951	82.349	86.437	95.41	87.248	10.912*	78.747		97.393	89.027	80.958	95.153	84.858	83.055	87.883		88.371	80.384	86.93	90.139	83.885	80.393	89.83
290	75.976	84.747	87.241	89.789	77.518	80.437	79.115		83.9	82.826	81.883	86.322	87.424	12.196*	77.475		83.44	85.016	89.437	81.906	82.217	82.156	80.169		81.704	79.625	86.302	94.565	81.232	80.269	84.561
300	72.877	88.931	76.953	86.412	82.768	83.477	75.61		82.329	93.214	81.031	87.924	87.866	15.439*	77.667		78.241	81.364	87.443	80.866	86.571	80.407	84.159		77.653	82.026	78.611	106.89	75.93	78.415	84.214
Panel D-Mean arterial pressure
	SDAP								SDFA								NSAP								NSFA
0	93.78	103.318	97.637	100.914	90.649	99.308	96.627		97.306	100.455	100.604	95.084	107.813	15.899*	94.744		94.207	94.944	99.796	91.536	98.357	95.261	98.885		98.366	103.844	105.558	118.745	99.633	98.878	100.075
10	108.808	113.691	115.569	109.484	109.054	116.018	108.424		107.594	111.825	103.807	114.83	116.723	14.065*	109.636		97.927	98.409	98.424	93.891	104.282	94.492	101.528		115.466	97.18	98.124	112.908	107.065	110.258	103.701
20	118.2	108.778	103.172	95.517	101.719	127.185	118.805		103.552	104.576	95.977	101.49	114.718	16.455*	111.841		99.448	99.093	106.224	94.202	103.444	94.608	107.249		91.995	107.422	102.944	104.321	105.297	104.851	101.417
30	95.44	105.465	97.268	92.181	104.014	116.168	95.094		96.423	95.813	93.726	97.789	103.215	9.527*	105.036		101.71	110.453	99.932	92.773	97.014	94.732	100.922		99.775	98.37	105.236	105.146	108.356	114.949	100.784
40	112.581	123.717	105.149	110.376	109.876	113.595	120.436		111.226	103.167	100.925	109.982	107.607	13.003*	107.671		103.651	110.499	90.788	96.289	91.2	97.996	103.848		97.299	102.772	97.315	108.344	116.454	108.308	102.276
50	106.221	121.141	91.715	112.971	112.309	126.621	110.874		114.018	97.298	94.522	105.751	123.058	14.547*	99.148		106.75	98.268	90.079	96.969	96.928	91.135	98.001		96.874	101.995	108.255	106.791	104.389	105.278	110.875
60	102.001	118.806	101.012	107.17	112.174	120.323	105.483		123.489	107.876	93.933	105.074	117.74	17.816*	106.275		103.135	101.121	95.42	99.32	98.356	99.759	104.165		103.174	98.856	93.685	110.545	106.746	100.411	97.669
70	115.174	128.132	108.767	112.122	107.578	118.693	115.009		112.584	98.663	98.706	94.436	105.016	11.17*	106.733		105.711	92.495	106.101	95.87	96.379	89.17	108.236		95.602	109.885	106.491	107.578	104.156	97.339	104.942
80	109.387	116.15	91.528	101.306	111.326	100.537	98.826		109.594	98.043	95.952	95.918	101.454	14.966*	110.364		93.128	92.614	95.497	97.585	98.503	98.267	119.792		100.711	118.234	103.991	105.141	99.07	91.426	98.742
90	104.42	103.187	94.833	98.477	106.076	97.045	98.214		104.965	101.784	108.929	107.898	104.288	15.239*	107.296		110.604	98.796	95.153	92.943	91.55	92.727	118.671		98.212	99.283	96.585	122.242	92.017	89.797	114.643
100	111.706	117.237	100.545	114.147	105.042	100.721	95.007		113.575	97.075	97.136	97.851	111.58	14.403*	110.269		97.715	98.333	98.439	97.734	109.957	103.648	117.489		102.388	101.414	92.993	110.888	83.631	92.255	97.675
110	110.586	120.705	107.446	96.962	100.693	94.431	96.552		112.87	112.644	102.286	107.73	113.156	16.821*	108.194		97.309	95.792	113.595	114.43	100.481	111.877	111.999		114.624	99.112	99.845	107.356	97.428	96.316	97.605
120	96.983	123.273	101.086	94.645	96.121	92.479	91.034		98.688	100.662	99.138	91.579	106.001	14.019*	96.325		96.651	92.908	115.219	110.963	94.573	118.34	116.526		120.13	97.571	112.985	108.936	92.5	101.48	107.762
130	113.81	123.026	108.361	94.399	101.179	108.566	112.997		111.326	120.732	116.531	99.291	109.11	15.415*	88.012		91.157	99.034	118.501	116.706	109.951	115.344	103.457		116.725	97.996	121.051	113.183	108.507	96.963	100.933
140	96.761	117.598	100.061	111.875	97.939	94.887	109.421		110.694	114.191	98.016	103.58	104.969	16.737*	99.378		103.156	103.308	109.691	108.654	118.938	98.547	96.99		108.642	100.042	94.054	113.95	118.796	96.575	117.775
150	90.681	111.984	94.318	98.181	106.041	100.2	109.178		107.18	119.021	98.634	102.455	112.522	10.475*	90.813		99.863	115.968	97.082	97.945	114.258	98.049	91.892		101.184	99.552	110.209	104.729	103.297	91.948	102.61
160	102.469	118.616	96.924	99.824	103.84	110.268	112.14		110.886	105.724	94.759	98.066	116.931	22.962*	97.784		108.287	112.214	98.207	102.676	112.984	93.871	113.18		98.559	97.283	112.212	108.378	96.282	92.687	103.305
170	101.907	106.285	92.616	96.221	105.154	100.832	92.861		101.231	102.422	94.664	99.847	113.068	19.42*	91.909		118.406	110.144	95.038	105.202	100.617	88.413	105.37		85.336	104.568	117.04	109.332	91.826	96.182	99.796
180	102.072	105.86	92.802	99.998	87.947	99.866	92.938		94.755	96.714	97.69	107.358	111.661	15.672*	95.561		106.998	103.586	111.64	96.128	96.757	91.507	98.063		91.135	98.882	117.128	120.986	91.994	94.925	101.409
190	98.25	100.28	104.344	97.751	104.228	121.347	95.749		96.683	101.924	96.609	114.219	108.524	13.407*	89.438		112.696	93.853	89.598	100.174	92.653	90.258	97.537		88.409	103.754	117.033	110.418	86.088	93.598	102.879
200	100.939	100.594	87.603	98.315	95.041	99.873	103.672		99.962	99.352	94.837	95.49	108.293	12.55*	99.821		116.725	96.519	105.076	90.066	92.381	104.895	107.804		89.335	102.703	113.152	108.803	84.672	99.389	111.366
210	90.298	101.566	92.007	96.532	104.874	95.688	98.196		106.201	102.625	95.574	99.037	111.332	15.045*	94.025		98.305	94.202	95.548	92.351	99.072	93.221	98.758		109.341	103.256	119.199	114.301	86	96.298	111.368
220	97.531	100.308	89.911	99.303	95.311	106.288	102.641		99.005	99.297	110.588	99.438	113.032	12.471*	92.819		92.869	90.988	93.248	94.763	93.563	93.096	107.22		110.46	107.34	118.495	105.619	93.538	103.644	103.15
230	95.437	105.77	87.913	93.782	93.238	97.049	102.36		110.245	94.453	107.725	97.086	105.126	12.661*	91.391		96.643	93.369	100.507	94.397	95.798	96.99	104.22		96.039	94.891	108.964	112.859	95.315	97.119	103.78
240	97.017	101.673	91.455	93.743	90.858	94.326	106.114		111.387	100.215	116.217	113.24	103.992	16.387*	88.314		93.345	95.803	94.147	93.445	95.366	102.722	111.341		90.278	96.618	111.595	115.198	91.948	97.551	105.752
250	91.39	103.181	95.735	99.018	95.02	108.269	102.439		100.838	106.932	105.732	102.55	115.221	13.982*	90.725		116.81	95.76	110.892	97.981	101.329	93.139	104.302		105.869	98.044	112.897	106.929	91.985	97.596	99.978
260	91.22	113.114	92.536	105.302	94.036	100.628	98.548		101.032	96.531	98.722	97.93	110.863	13.279*	93.557		97.953	98.714	92.121	99.332	103.628	103.926	110.515		97.792	100.478	101.588	120.423	104.053	97.053	102.526
270	95.195	113.605	100.945	93.507	103.213	108.737	90.387		103.081	99.961	96.414	118.125	112.74	15.745*	90.199		101.254	93.686	96.601	99.74	100.673	97.748	107.942		103.008	94.91	90.574	114.626	97.077	94.004	100.489
280	95.544	100.803	94.565	99.126	94.201	105.584	102.684		103.915	98.167	100.284	111.066	107.877	13.149*	93.986		113.282	104.667	94.875	112.302	103.712	97.513	105.515		104.732	95.165	103.602	106.33	98.944	93.416	103.901
290	90.852	105.212	104.134	106.498	92.219	96.974	96.258		101.552	99.006	94.474	101.512	108.329	14.865*	92.75		98.212	99.124	103.029	96.509	99.58	97.627	95.702		96.791	94.598	101.333	113.368	94.703	93.609	99.636
300	87.919	110.231	92.044	102.087	98.101	99.938	91.077		97.676	107.928	93.739	104.407	109.675	18.109*	92.676		92.579	95.854	102.471	94.501	105.377	95.325	99.955		93.588	97.743	94.614	125.985	90.532	91.546	97.909
Panel E-Activity
	SDAP								SDFA								NSAP								NSFA
10	0.5	2.3	1.1	2.6	1.6	0.9	1.2		0	2.3	2.1	1.2	1.4	4.2	1.5		0.3	0	4.7	0.3	5.4	3.6	0.3		2.1	0	0.2	2	2.4	2.8	2.1
20	8.9	9.9	4.9	4.2	8.4	4.2	22.3		7.2	6.8	0.7	5.8	8.3	4.7	3.1		0.4	0.6	0	0.1	1.2	0	0.2		0	0	0	0.1	9.2	3.5	0.5
30	7.4	2.5	2.1	0.2	14.1	5.9	3		1.3	0.1	0	0.1	3.7	0.3	2.1		0	0	0	1.3	1.2	1	0.3		0	0.2	0	1.2	10.4	4.6	0
40	0.5	3.7	2.3	0.6	5.6	9	7.4		2.9	2.1	3.3	4	3.6	6.6	2.7		0.4	0	0.4	0	0.4	0.2	2.3		0	0.3	0.1	0	10.9	10.3	0
50	10.7	9.4	13	4.4	19.7	6.6	14.2		2.9	0	0.8	7	2.9	0.6	1.5		0.6	0.2	0.1	0	0.3	1.3	0		0.2	1.2	0.1	0.4	5.4	9.7	1.5
60	4.3	5.5	3.5	1.6	2.4	5.5	9.7		4.3	0	0	2.8	0.1	7.1	3.3		0.7	0	0.1	0.2	0.7	0	0		0.2	0	0.1	0	11.2	5.4	0.4
70	1.9	6.1	2.9	3.6	0.7	1.7	4.8		10.1	1.1	3.4	2.7	1.7	8.7	3.2		0	0	0.4	0.7	1	0	0.1		0	3.3	0	0	15.1	11.6	1.2
80	18	7	10.1	12.9	14.6	4.4	11.5		11	0	1.1	0.6	0.1	3.8	5		0.1	0.1	0.3	0	0.8	0	0.1		0	2.4	0	0	10.8	0.2	0
90	7.7	2.4	0.5	2.3	3	0	0.4		7.5	0	0	0	0.9	0	0.1		0	0	0	0.2	0.8	0	6.1		0	1.4	0.2	0.2	3.4	0	0
100	14.5	11.9	4.5	3.6	10.8	2.5	6		9.6	2.2	1.9	1.3	1.9	4.7	3.2		0	0	1.9	0	0	0	10.2		0	0.5	0.2	0.1	0.1	0.4	0
110	7.6	8.5	2.5	6.6	7.1	0.3	1.7		2.7	0	2.9	0.1	0.1	0.5	5.4		0.2	0.5	7.1	1.3	0.5	1.3	8.2		4.9	0	0	0.3	0.6	0.1	0
120	2.8	7	6.3	2.2	1.1	0.3	0.8		4.8	0.1	0.4	0	0	0.4	0.2		0.1	0.6	10.1	5.3	3.2	10.1	8.5		8.8	2	0	2.6	1.2	3.8	0
130	4.1	6.2	6.9	0.8	1.1	0.5	4.7		9.4	3.5	4.5	3	2.7	4.6	1.6		0	1	5.9	17.6	2.8	7.7	1.3		7.4	0	0.6	0.9	0.2	0.1	0
140	5.5	11.9	8.4	1.3	1.8	0.6	7.7		8.2	7.5	4.3	0.2	0.6	0.2	0		0.1	1.7	2.7	5.3	11.2	3.8	1		6.5	0	0.6	0.6	6.2	0	0
150	0.3	4.3	5	2.3	0.1	0	8.1		4.1	7.2	0	0.7	0	2.1	0		0.2	2.8	8.4	0.5	16.4	3.6	1.9		8.5	1.7	0	0.1	8.6	0	0
160	0.3	9.5	0	2.2	1.4	1.9	5.1		14.8	6.3	2	1.2	6	6.9	0.5		0	6.2	0.2	2.7	4.9	2	0.5		1.5	0	0.1	0.1	4.4	0	0.2
170	4.8	6.8	2.9	0.8	1.4	1	3.1		9.6	0.2	0.1	0	2.2	7	0		0.3	3.1	0.1	10.2	1.3	0.5	0.1		1.3	0.5	0.4	0	0.2	0	0
180	0	0.5	0	0.9	0.1	0	0.8		0.9	0	0.2	0.1	7	3.7	0		2.2	0	0	0.5	0	1.4	0.5		0.2	0	1.5	0.2	0.1	0	0.2
190	3.5	1.9	2.9	2.3	2.4	2.1	2.2		2.8	2.5	1.9	2	3.4	7.2	0.4		6.2	0.9	1	0.6	1	0.4	0.1		0	0	6.3	0.3	0.6	0.8	0
200	0.2	0.2	0	0	0	0.7	2.4		0	0.2	0	0.6	0	3.2	0		4	2.6	0	0.3	1	0.1	0.9		0	0	4.4	0	0.6	0.1	0.2
210	0.4	0.2	0	0.1	0	0	1.2		0.5	2.4	0.1	0	0	0	0		0.5	2.2	0	0	0.6	1	0.1		0.4	0.1	3.4	0	0	0.2	1.8
220	0.1	4.6	1	3.3	1.4	1.6	3.8		1.3	3	2.4	3.4	2.7	4	0.2		0.1	0	0	0	0	0	0		0.7	0.1	3.9	0.1	0	0.4	0
230	1.7	1.6	0.9	0.4	1.1	0.2	0.4		0	0	2.5	0.7	0.3	0.3	0		0	0.5	0.3	0.4	0.4	0	0		0	0.7	0.9	0.6	0.1	0.4	1.7
240	0	0.1	0	0.2	0	0	0.2		0.2	0.8	1.9	0.7	0.1	0.8	0		0.1	0.9	0	0	0	0	0		0	0	6.6	0.3	0.3	0.2	0.3
250	0	0.2	0	0	0	0.2	1.3		0.1	0.2	3.3	0.9	0	2.9	0.5		0.2	1.8	0	0.7	0.5	0.1	0		0	0	1.2	0.6	0.1	0	0.4
260	0.7	10.4	1.7	0.7	2.5	2.1	2.9		1.7	0.8	0.8	2.5	1.8	1	0		0.1	0.1	1	0.5	0.4	0	0		0	0	0.5	0	0	1.1	0.6
270	0	0.2	0	0.5	0	0	3.7		0	0	0.8	0	0.1	0	0		0.3	0.2	1	0.2	0.3	0.4	0.1		0.2	0.8	1.7	0	0	0.3	0.1
280	0	0.5	0	0	0.6	1.8	2.9		1.7	0.7	2.9	2.1	1.8	1.4	1		0	0.1	0.2	0.1	0.1	0.5	1.2		0.1	0	0	0.7	0	0	0
290	1.9	2.7	3.2	0.9	3.4	0.2	4.6		0.3	0.2	0.5	1.9	0	0	0.1		0	0	0	0.6	0	0.5	0		0.2	0.2	0	0	0	0	0
300	0.1	0	0.1	0.4	0.6	0	0		0	0	1	0	0	2.6	0.1		0	0	0	0	0.4	0.2	1.1		0	0	0	1.5	0.5	0	0

## Sheet: Fig 5 echo
Echo data
Panel A -Heart rate
	Normal Sleep-Filtered Air									Normal Sleep-Air Pollution									Disrupted Sleep-Filtered Air									Disrupted Sleep-Air Pollution
Baseline	333.341	366.799	378.774	345.548	360.637	330.869	356.196	327.206		333.726	371.495	333.97	318.208	313.35	332.759	295.148	305.439		362.924	324.471	380.195	325.238	313.201	326.509	346.909	350.25		331.349	330.291	335.688	379.341	353.663	371.619	355.343	378.24
Post-final exposure	368.832	343.937	369.351	309.655	348.774	330.511	340.656	321.257		333.55	338.469	322.583	312.731	310.995	312.471	314.106	280.122		347.417	336.185	343.299	311.875	302.646	307.797	333.695	368.192		336.031	333.558	347.677	362.523	320.793	355.492	324.305	337.273
Panel B -stroke volume
	Normal Sleep-Filtered Air									Normal Sleep-Air Pollution									Disrupted Sleep-Filtered Air									Disrupted Sleep-Air Pollution
Baseline	219.86	255.478	239.708	149.082	214.723	259.65	178.232	173.821		279.036	231.017	250.563	209.824	203.324	194.22	223.147	182.967		281.178	234.387	199.759	212.831	245.046	239.226	171.614	236.308		277.613	236.863	187.126	137.845	235.026	180.77	220.293	248.525
Post-final exposure	256.899	260.728	258.985	230.202	217.963	296.294	200.608	250.805		294.188	290.842	259.376	206.445	222.207	245.961	290.257	209.866		307.468	242.021	234.698	269.092	257.38	223.434	245.268	248.496		284.638	259.864	246.958	243.451	264.267	255.263	286.502	246.151
Panel C-cardiac output
	Normal Sleep-Filtered Air									Normal Sleep-Air Pollution									Disrupted Sleep-Filtered Air									Disrupted Sleep-Air Pollution
Baseline	73.292	93.7078	90.8468	51.5026	77.4331	85.908	63.505	56.8739		92.9912	85.8438	83.6427	66.6938	63.7114	64.5424	65.6865	55.9645		101.974	76.0277	75.955	69.2194	76.6623	78.1097	59.4277	82.8616		92.0104	78.2207	62.8396	52.2888	83.0965	67.2009	78.3155	94.0005
Post-final exposure	94.8422	89.6509	95.7824	71.3309	76.0932	97.9166	68.3493	80.6		98.1196	98.4467	83.7742	64.4366	69.2335	76.8454	91.2509	58.7948		106.833	81.3835	80.6697	83.914	77.8843	68.7916	81.7902	91.5164		95.834	86.6177	85.9263	88.2533	84.7687	90.7092	93.0064	83.0142
Panel D-End systolic volume
	Normal Sleep-Filtered Air									Normal Sleep-Air Pollution									Disrupted Sleep-Filtered Air									Disrupted Sleep-Air Pollution
Baseline	66.4988	45.4762	107.227	33.3099	84.8038	143.248	38.718	103.09		157.612	87.9289	89.3372	78.5171	66.6213	66.8834	74.0728	100.39		85.604	65.6124	39.3959	51.0638	73.1316	93.4424	35.151	43.5946		125.474	81.0522	61.3058	65.9117	44.6588	52.2169	42.6174	66.7207
Post-final exposure	23.7304	53.8304	122.309	51.2927	59.6786	150.319	93.1667	84.6313		167.56	99.8236	80.5789	44.4875	48.7383	70.705	107.32	59.2748		101.719	60.7791	83.1052	51.4743	98.7128	78.022	61.4839	35.8918		74.9792	82.7968	73.2174	77.0452	49.4857	62.2444	61.1368	72.1379
Panel E-End diastolic volume
	Normal Sleep-Filtered Air									Normal Sleep-Air Pollution									Disrupted Sleep-Filtered Air									Disrupted Sleep-Air Pollution
Baseline	286.359	300.954	346.935	182.391	299.527	402.897	216.95	276.911		436.648	318.945	339.9	288.341	269.946	261.104	297.219	283.357		366.782	300	239.155	263.895	318.177	332.668	206.765	279.903		403.088	317.915	248.432	203.757	279.684	232.987	262.911	315.246
Post-final exposure	280.629	314.558	381.294	281.494	277.641	446.613	293.775	335.436		461.749	390.666	339.955	250.933	270.945	316.666	397.577	269.14		409.187	302.8	317.803	320.567	356.093	301.456	306.752	284.388		359.618	342.661	320.175	320.496	313.753	317.508	347.638	318.289
Panel F- ejection fraction
	Normal Sleep-Filtered Air									Normal Sleep-Air Pollution									Disrupted Sleep-Filtered Air									Disrupted Sleep-Air Pollution
Baseline	76.7858	84.9021	69.109	81.738	71.6844	64.4588	82.1527	62.7538		63.8686	72.3784	73.7177	72.723	75.3344	74.8111	75.905	64.6184		76.6577	78.3119	83.3826	80.7334	77.0226	71.8993	82.9547	84.3259		68.9518	74.4845	75.2876	67.6571	84.0332	77.6704	83.7808	78.8455
Post-final exposure	91.548	82.8912	67.8783	81.8187	78.593	66.3438	68.2859	74.8583		63.8121	74.4753	76.303	82.1402	83.2208	77.6156	72.9886	78.0375		75.1501	79.9634	73.8264	84.5419	72.2948	74.145	79.9011	87.4163		79.4146	75.8875	77.0922	76.0264	84.2275	80.4613	82.3782	77.3182
Panel G- fractional shortening
	Normal Sleep-Filtered Air									Normal Sleep-Air Pollution									Disrupted Sleep-Filtered Air									Disrupted Sleep-Air Pollution
Baseline	46.8634	55.7053	40.2852	51.3519	42.2696	36.7379	52.0167	35.0065		36.3625	42.9925	44.2242	43.1471	45.4043	45.0063	46.0917	36.4756		47.0741	48.6942	53.6133	50.7856	47.2818	42.5999	52.8463	54.9075		40.3793	44.8417	45.3306	38.4442	54.5716	47.4984	54.3174	49.0178
Post-final exposure	64.9864	53.3677	39.3763	52.0747	48.634	38.3158	39.3991	45.3113		36.433	45.1253	46.6295	52.2041	53.8672	47.8497	43.7759	48.0334		45.7961	50.1531	44.2623	55.6585	43.0478	44.4828	50.1484	58.8486		49.9019	46.3003	47.3291	46.3751	54.9229	50.7504	52.9096	47.529
Panel H-L ventricular anterior wall thickness systole
	Normal Sleep-Filtered Air									Normal Sleep-Air Pollution									Disrupted Sleep-Filtered Air									Disrupted Sleep-Air Pollution
Baseline	2.92247	3.10039	2.24189	2.91357	2.51768	2.11734	3.13598	3.38953		2.41537	2.94916	2.88243	2.81571	2.85129	2.91802	2.71785	2.26413		3.04257	3.30056	3.20715	3.08705	2.62888	2.98474	3.03812	3.4518		2.68226	3.34949	2.87176	3.05591	2.75788	3.41622	2.86909	3.12708
Post-final exposure	3.56745	3.31391	3.00253	3.43401	3.09595	2.47765	3.12263	3.73649		2.69561	2.90467	2.84685	3.35394	2.9714	2.87798	3.02033	2.98474		2.52658	3.23829	2.84685	3.27743	2.96695	3.3317	3.11819	3.56301		3.03091	3.47404	3.23829	3.03812	3.28277	3.46515	4.00338	3.3228
Panel I-L ventricular anterior wall thickness diastole
	Normal Sleep-Filtered Air									Normal Sleep-Air Pollution									Disrupted Sleep-Filtered Air									Disrupted Sleep-Air Pollution
Baseline	1.71256	1.67252	1.4768	1.81042	1.47235	1.28553	1.78818	2.40203		1.39673	1.70366	1.62359	1.75704	1.60135	1.64139	1.74814	1.2366		1.78373	1.75259	1.89493	1.7259	1.50349	1.65473	1.69476	1.93497		1.44122	2.19741	1.92696	1.8638	1.45011	2.13514	1.79707	1.70811
Post-final exposure	1.89048	1.88604	1.80152	1.99724	1.82376	1.68587	1.85045	2.41982		1.67697	1.73924	1.66807	2.03283	1.7348	1.59245	1.92607	1.62359		1.47235	1.87269	1.74369	1.92162	1.61025	2.13958	1.65028	1.91273		1.80529	2.21965	1.80597	1.95276	2.08176	2.31751	2.53992	1.73035

## Sheet: Figure 6
Figure 6 gene expression data is included in a separate supplementary file

## Sheet: Fig S1-pilot
Pilot Data
Panel A -Activity				Panel B -Heart rate					Panel C -systolic BP				Panel D-Diastolic BP				Panel E -QAI				Panel F-Temperature
Normal Sleep	Sleep Disruption			Normal Sleep	Sleep Disruption				Normal Sleep	Sleep Disruption			Normal Sleep	Sleep Disruption			Normal Sleep	Sleep Disruption			Normal Sleep	Sleep Disruption
1.00454	7.51613			286.496	316.187				123.293	128.004			83.2936	86.2886			40.7991	38.7284			37.1481	37.3655
1.41301	11.6129			283.051	316.187				120.06	126.392			83.3647	87.616			39.3224	37.4457			36.789	37.2562
1.7761	5.58065			318.032	343.823				123.923	133.38			90.4475	92.1658			40.8834	38.9818			36.6506	37.0472
1.34947	7.51613			320.471	330.257				111.906	117.699			78.3629	82.9247			41.0506	40.6377			36.9249	37.0195
0.647504	8.58065			308.224	341.955				104.233	108.447			79.3395	81.3139			39.8529	37.5473			37.0549	37.6124
0.659607	6.19355			304.236	329.407				123.422	131.254			82.0907	88.922			40.0993	38.7464			36.8684	37.1168
1.4705	13.2581			282.428	323.319				118.037	126.639			83.2221	88.7326			41.0735	38.0841			37.0582	37.2553
0.762481	3.74194			289.754	315.399				121.844	126.639			83.8573	90.5886			43.5755	41.4582			37.0912	37.4158

## Sheet: Fig S2-pilot cort
KM1 corticosterone data
Naive	Immediate	One-day
128371	240607	190178
367216	156632	228311
1966.21	204463	123491
193989	192612	366778
146101	352468	319502
224012	249039	465900
142904	253205	128174
211654	262644	158799

## Sheet: Fig S3&S4 day 1 handling
Panel A- Activity
	SDAP								SDFA								NSAP								NSFA
0	2	0	0	0.8	0	1.1	0.5		0.3	0	0	0	0	0	0.1		0.6	0	0	1.9	0.1	0.3	0		0	0.2	0	0	2.8	0	0.7
10	0.6	1.9	0.7	4.6	1.7	0.2	5		3	6.7	1	8.7	4.4	6.3	5.1		1	0	2	0	0	0	0.3		0.3	0.1	0.2	0	0	0	0.1
20	12.2	10	7.4	12.1	6.2	4.7	16.1		1.4	3	4.2	7.6	13	24.7	10.1		0	0.2	0.7	0.2	0.8	2.1	0.2		0.2	0.3	0	0.3	0	0.3	5.2
30	6.8	2.8	2.9	2.6	6.9	13.8	7.3		0	2.6	71.2	7.5	2	17.3	2.6		0.2	0	0.2	0	0.3	0.2	0.4		0	0.2	0.4	1.5	1.6	0.6	5.4
40	2.7	2.5	3.3	4.8	6.7	3.6	7.8		2.4	4.4	1.6	6.3	9.2	10.1	6.1		0	0.1	0	0	0.7	0	0.9		2.9	1.7	0.6	0.3	0	0.1	0.2
50	9.1	11.2	3.2	6.2	5.9	5.1	3.3		6.7	0	4.5	9.4	2.3	5	10.4		0.8	2.5	0	0	5.6	0.3	3.5		0.2	0.1	0.1	0.1	0	0	0.2
60	8.7	12	13.1	2.1	0.5	9.7	0.1		5.2	1	0	5.4	0	2.4	12.6		0	2.7	1	0.1	0	0.1	0.2		0.6	0	0.2	2.8	3.9	0.3	0
70	3.6	6.3	9.8	0	0.3	2.4	2.7		4.4	7.1	0.9	4.5	2.4	7.9	9.4		0.5	0.7	0	1.4	0.2	0.1	0		0.7	0	0	2.7	2	0	0.6
80	14.2	15	11.6	3.7	7.7	5.3	13.2		3.5	7.4	4.6	2.1	0.2	5	6.4		0	0	0.1	0.4	0	1.5	0.3		0.2	0	1.1	0.3	0.1	0.6	0.1
90	5.3	7.7	7.8	0	6	2.9	10.7		0	0.1	1	0	0	3.2	5.9		0	0.1	0.5	0	0	0	0		0.6	0	0	0	0.1	0	0.1
100	7	7.2	4	2.1	.	0.1	5.1		2.2	6.5	4.3	4	4.4	3	6.4		0.1	0	0	0.2	0	1.1	0.1		0.1	2.6	3.3	1.2	0.1	1.5	1.5
110	14.3	10.7	7.7	15.2	6.1	1.6	13.6		6.1	6.6	2.4	12.6	0.6	1	7.2		0.1	0	0.1	0	0	0	0		0.1	4.2	0.8	0	0	3.9	0
120	1.6	5.3	1.4	11.4	1.6	0	13.9		4	3.7	2.3	1.4	0.6	0	3.8		2.7	0	0.3	0	0.5	0	0.1		0	5	0.2	0	0	5.1	0
130	4.7	0.3	0.1	2.8	1.2	4	3.8		1.8	6	0.9	2	7.4	3.4	7.3		6.1	0	0.5	0	0.4	3.9	0.3		1.1	0	0.2	0	0	0.3	0.4
140	25.5	25.5	12.9	7.6	2.5	7.5	14.3		0.7	1.3	3.4	5.1	0.4	5.1	1		3.5	0	0.2	0	0.1	2	0		0.1	0.1	0.5	0	0.8	0.3	0
150	20	12.6	6.3	1.7	3.6	7.3	0.2		0.7	0	4.3	1.9	0.2	0	1.3		0	0	0	0	0	0.1	0.6		0.1	0.2	0.8	0.4	18.4	0	3.3
160	3.2	8.1	0.5	1.7	1.3	5	5.5		3.1	9.8	4.2	3.5	7.9	5.5	2.2		0.1	0	0.8	1.7	2.2	0	0		0.9	0	13	0.1	12.5	0.1	5.9
170	11.2	12.5	2.3	2.1	1.5	13.5	9.5		1.1	7	7.2	7.4	2.4	6.7	0.4		0.2	2.6	1.1	7.2	2.1	0.2	0		1.6	0	1.8	2.1	3.3	0.3	8.9
180	5.7	12	0	0.3	0	3.5	0.1		0.1	0	0.4	3.8	1	9.3	0		0.5	0	0.1	3.7	0	1.8	0.1		0.6	0	3	1.8	0	0.3	6.7
190	0.2	7.5	0	3.4	1.3	3.8	6.2		1.7	8.7	2	5.2	7.2	9.8	2.1		1.5	0	3	4	0	0.5	0.3		0.1	0.1	6.4	0	0	0	0.2
200	2.4	7.5	4	9.4	0.1	9.2	1		0	0.8	0	4.8	3.2	12.7	0		0.2	0	3	3.2	0.2	0.1	0.6		0	0	0.2	0	0.1	0.6	0.2
210	0.3	0.8	0	0	7.9	0.7	0.4		0	0	0	7.5	1.9	7.5	0.1		0.2	0.1	0.5	0	0.1	0	0.1		0	0.1	0	0.2	0	0.2	0.9
220	0.2	4.4	0.8	3.2	3.3	3.3	3.4		2	8.7	0.8	10.5	6.4	11.2	5.9		0	0	0	0.3	0	0	0		0.2	0.1	0.2	8.1	0	0	1
230	6.3	5.2	7.3	2.3	0	7	0.9		0	3	1	1	2.7	0.8	0		1.3	1.9	0.1	0	0.3	0	0.7		0.1	0.1	0.1	0.4	0.1	0.3	0
240	0	0.2	0	0.4	1.1	0.1	0		0.3	0	0	0	3.2	0	0.1		0.4	0	0.8	0	2	0.7	0		0.1	2	0	0.2	0	0.3	3
250	0	1	0.2	3.8	2.4	4.9	9.7		2.3	7.4	0.9	3.7	10.3	5.8	1.7		0.3	0	0.1	0.1	12.9	0	0		0	4.5	0	0.8	0.3	0	0.7
260	11.5	4.6	3.9	0.5	1.2	0	13		0.1	0	3.2	1.6	4	0.8	0.1		0	0.7	1.7	0	13.4	1.2	0.2		0.3	1.4	0	0.4	0.2	2.5	0.4
270	3.7	2.4	0.2	1.3	0.2	0	7.1		0	0	6	3	0	0	0.1		0	0	1.8	0.4	2.9	3.3	2.4		0.5	0.1	0	0	0.2	0	0.3
280	1.9	4.5	2.3	0.2	5	3.4	6		2.8	9.1	2.6	2.8	4.8	5.7	8.2		0	0.1	8.9	1.2	4.5	2.7	5.3		0.3	0.1	0	0	0	0.1	0.7
290	0	2.5	6.1	5.5	0.7	2.5	1.1		0.2	1.1	0.2	0	0	2.4	1.7		0.2	0	6.2	0.2	1.3	7.7	14.2		0.6	0.5	0	0.7	0.6	0.2	0
300	0.2	0	0	2.1	1.3	0.2	0		0	0	0	0	0	0	0.4		0.5	0	0	0.1	0.6	2.3	5		0	2.4	0.7	1.1	0.6	0.4	0
Panel B-Heart rate
Time (min)	SDAP								SDFA								NSAP								NSFA
0	300.462	328.118	319.949	344.183	296.239	308.694	294.148		307.429	319.791	307.408	312.192	325.721	337.896	346.861		300.736	312.031	310.275	307.709	293.59	287.488	290.045		282.291	280.702	323.42	349.622	314.326	313.357	314.009
10	331.357	444.361	349.854	342.166	398.308	400.527	369.243		339.212	390.588	383.791	356.086	350.013	442.673	426.564		320.477	299.564	317.305	295.944	289.167	306.289	290.098		332.113	285.266	293.592	333.372	317.655	312.096	303.217
20	360.264	363.93	350.754	320.725	397.597	380.079	375.434		337.492	326.263	361.384	430.51	361.409	412.353	404.693		378.974	298.402	368.999	295.254	297.947	289.913	318.748		298.77	282.353	337.237	320.613	320.905	305.997	377.816
30	364.156	325.851	336.962	337.202	368.246	332.232	306.866		326.486	307.938	315.1	362.191	358.461	395.584	400.915		317.905	313.296	311.59	323.77	286.775	289.246	272.616		295.155	313.924	310.08	320.958	312.952	305.112	308.143
40	355.553	402.246	366.558	373.27	391.871	344.598	334.372		416.267	321.543	315.453	379.283	348.164	400.444	417.06		306.025	351.335	319.154	317.279	280.073	294.922	317.402		286.863	279.999	302.1	312.824	336.199	307.883	307.77
50	364.689	417.358	347.001	426.628	392.723	411.672	308.751		359.582	308.659	305.156	383.086	327.646	352.214	393.869		310.286	357.571	336.384	287.574	274.695	288.811	285.411		285.519	272.616	325.289	360.145	318.656	317.806	308.556
60	340.978	395.994	358.422	336.259	323.589	372.69	307.097		311.288	306.505	295.115	352.621	327.411	347.953	408.869		288.737	306.225	315.251	288.564	291.927	300.288	301.963		295.911	271.563	324.386	342.146	317.71	303.153	344.174
70	372.47	431.781	354.345	329.237	415.521	380.777	349.398		320.295	400.08	345.702	355.262	324.074	419.785	400.343		300.065	322.925	318.644	338.732	289.456	299.234	358.52		290.12	294.068	310.48	315.693	309.849	304.529	329.477
80	352.647	455.708	357.969	319.502	389.421	357.293	337.172		308.91	361.997	365.424	322.559	315.662	357.113	430.94		293.623	300.499	339.272	315.228	303.782	288.232	283.528		295.151	273.153	313.086	353.65	300.79	310.197	298.078
90	368.881	421.19	340.863	312.009	405.052	318.158	349.52		304.091	329.394	396.986	307.77	316.788	363.899	394.344		301.62	327.28	341.425	307.273	299.622	289.194	271.666		298.883	293.095	320.987	335.1	307.729	321.716	315.928
100	382.02	403.641	339.735	360.779	411.289	349.719	378.937		307.617	359.678	360.231	385.92	312.717	377.083	397.411		324.051	297.797	312.862	299.058	284.094	293.63	271.819		299.343	302.211	298.859	310.375	311.542	366.254	304.508
110	348.673	401.133	332.004	429.57	348.227	313.017	380.595		362.155	373.561	396.626	334.208	315.274	353.359	411.754		380.143	317.973	321.768	311.876	275.351	296.266	277.188		304.665	297.393	287.782	309.399	315.167	319.224	323.902
120	353.844	332.818	313.294	332.583	326.874	305.746	329.449		302.422	312.756	316.485	314.422	328.335	388.762	391.196		394.35	313.488	360.536	309.975	277.321	351.945	273.174		370.653	273.328	325.808	302.046	314.489	311.511	324.139
130	335.528	417.678	374.185	381.62	385.265	360.877	365.191		307.815	354.809	335.577	412.256	314.969	387.33	343.953		358.902	304.047	320.668	294.232	299.457	295.54	292.039		287.767	294.014	318.212	303.098	326.362	303.088	282.275
140	360.025	430.4	351.767	336.669	314.468	376.211	320.974		302.998	316.318	374.811	393.251	329.717	352.824	386.669		309.935	302.267	319.481	292.415	291.958	296.18	297.772		303.663	319.582	305.937	337.779	357.412	317.027	319.494
150	336.394	418.133	307.227	312.877	310.771	391.302	325.719		333.823	357.951	314.901	311.962	328.083	400.254	328.945		298.212	296.701	314.054	321.641	308.05	283.126	290.264		311.069	275.759	383.659	295.001	391.82	320.292	320.505
160	358.399	421.415	289.025	342.132	352.368	381.422	360.418		306.927	357.169	382.549	384.402	315.455	409.175	325.105		293.232	316.66	331.442	363.238	334.214	288.761	285.738		290.437	268.609	414.222	318.217	367.287	303.336	345.17
170	352.257	463.364	300.295	367.932	306.33	373.963	322.304		307.665	342.777	353.828	355.707	317.418	400.971	335.742		290.8	281.335	317.29	354.49	295.935	295.262	278.018		286.6	278.815	421.282	312.222	322.959	314.025	380.975
180	304.276	424.201	313.171	326.809	306.317	361.349	344.279		313.557	321.253	303.65	321.725	301.989	426.474	338.914		355.753	288.952	303.914	348.288	279.413	294.645	306.064		312.054	276.608	425.872	303.336	324.442	300.499	321.568
190	308.814	413.706	295.001	358.848	327.451	362.653	338.374		297.473	341.212	348.363	372.116	315.021	438.518	329.576		305.461	296.621	376.541	335.889	278.569	296.324	282.204		309.428	263.815	345.386	313.325	311.558	320.395	311.919
200	316.343	351.156	333.071	348.615	308.028	359.544	316.068		326.448	320.915	315.668	402.046	333.104	373.083	319.006		305.486	291.765	309.915	325.925	289.407	293.782	295.988		303.132	268.066	319.941	311.033	322.207	302.55	299.402
210	317.938	360.73	291.407	334.442	297.677	345.806	334.172		305.761	329.87	325.825	383.325	329.582	410.331	358.568		311.643	301.598	297.653	318.698	274.018	289.649	333.786		287.409	267.652	316.693	320.78	322.009	327.336	322.101
220	335.306	365.584	294.181	321.429	324.686	382.57	325.222		300.897	355.542	319.464	344.601	355.348	356.25	308.197		341.817	311.461	302.463	316.64	297.922	301.154	328.902		288.521	269.106	309.07	356.017	328.155	317.971	282.119
230	322.207	341.113	291.724	318.505	305.994	321.756	314.817		306.483	312.645	295.285	366.167	325.007	354.794	309.478		329.969	286.45	304.79	300.803	281.619	291.115	280.274		309.118	272.807	309.996	346.592	319.25	320.395	279.692
240	322.401	375.791	298.937	332.444	319.823	320.076	357.528		305.665	307.422	328.985	321.005	355.551	398.822	346.055		310.13	317.322	301.394	308.315	334.458	282.343	300.368		290.25	291.341	315.917	307.136	306.502	301.558	296.256
250	356.238	328.988	287.762	330.398	335.347	359.432	393.387		300.958	325.812	391.871	350.38	398.25	348.042	307.202		303.547	297.414	361.19	311.1	328.517	300.643	291.692		283.794	294.216	313.872	288.631	310.86	316.045	296.693
260	349.377	348.807	309.715	349.264	307.471	323.537	410.227		307.92	313.562	365.194	340.243	329.689	350.611	348.096		293.444	299.235	370.838	331.564	358.735	314.773	375.927		307.207	262.978	336.034	344.601	331.921	313.673	279.899
270	326.06	358.184	307.46	347.774	294.193	317.63	305.746		304.446	313.636	402.019	335.965	324.922	374.099	377.15		302.303	324.65	361.76	339.065	343.608	338.721	362.202		281.77	309.545	315.895	304.212	353.214	307.961	285.739
280	305.567	356.071	291.257	356.733	340.686	348.866	302.8		298.672	387.683	314.036	324.24	316.977	383.445	357.575		314.263	305.146	409.263	308.781	275.461	412.455	368.238		281.858	296.681	317.455	314.721	319.735	315.487	286.379
290	321.017	350.235	321.105	394.109	307.997	319.944	336.65		308.714	326.242	313.285	334.195	334.819	346.167	311.999		341.47	309.116	338.909	322.322	276.124	316.13	392.575		320.753	271.264	296.692	317.615	315.37	308.46	295.777
300	315.296	381.141	308.338	340.909	285.261	326.894	338.447		302.983	348.458	303.96	314.821	342.489	355.998	312.378		392.898	300.229	322.357	350.005	303.081	332.725	392.476		275.441	264.579	304.645	360.356	313.803	311.688	300.25
Panel C- Systolic BP
Time (min)	SDAP								SDFA								NSAP								NSFA
0	115.234	129.822	114.261	125.772	108.946	123.075	114.199		119.164	115.153	117.808	131.163	128.582	75.637*	114.29		119.408	124.469	119.405	111.581	110.918	109.296	126.547		122.973	117.478	138.652	137.07	116.731	106.08	126.558
10	131.678	138.73	127.568	129.208	129.566	138.468	131.946		125.913	140.579	127.795	135.816	144.141	80.072*	123.643		127.518	118.775	118.817	103.36	109.237	121.194	125.021		140.977	120.285	117.978	129.39	120.366	112.696	129.083
20	130.023	134.674	122.577	123.732	126.697	138.694	139.4		123.589	120.219	136.361	144.353	141.207	73.885*	126.586		126.448	117.227	133.179	112.078	127.823	111.332	122.26		116.358	118.072	137.397	126.381	113.723	111.878	140.753
30	134.649	121.812	125.288	125.609	123.954	129.354	115.544		127.959	120.094	118.674	131.417	140.357	83.055*	125.446		125.032	121.689	120.256	119.723	117.01	109.556	124.401		120.236	114.801	122.837	116.386	113.326	105.996	129.272
40	133.147	144.779	128.175	133.913	116.852	144.005	132.948		128.695	124.709	120.614	129.036	140.751	71.161*	119.586		119.743	130.34	122.912	108.57	113.634	117.84	130.584		119.472	111.269	118.693	119.214	108.476	111.147	134.313
50	122.116	139.824	129.488	141.172	125.902	143.633	114.59		127.613	118.171	121.431	134.574	125.194	68.541*	119.865		126.087	129.973	128.027	115.133	111.06	111.014	126.947		118.659	110.756	123.246	137.348	111.162	114.237	124.279
60	125.69	131.32	128.326	127.802	117.367	132.973	108.337		119.772	118.289	116.566	129.81	127.231	75.351*	120.693		111.416	121.78	117.935	117.328	105.029	119.718	140.721		125.963	113.089	120.769	132.485	117.556	109.858	133.088
70	140.639	144.945	127.199	125.384	128.433	143.69	121.206		118.833	132.01	122.126	130.806	132.444	78.099*	124.413		117.784	135.139	120.2	120.927	112.091	108.547	122.7		120.485	116.824	122.877	131.135	112.617	111.041	121.561
80	136.92	143.587	127.506	120.473	117.822	129.182	132.154		111.269	125.475	133.197	125.043	125.208	70.535*	137.842		116.566	119.191	131.9	118.564	123.637	115.234	125.043		128.246	111.415	121.606	133.86	116.652	117.207	123.72
90	126.996	132.166	121.14	119.933	131.233	132.211	129.352		106.182	118.3	125.86	121.06	134.115	80.478*	124.898		117.251	125.757	133.877	110.457	121.985	124.397	119.933		117.474	122.066	127.61	128.678	114.931	111.268	122.15
100	135.852	147.164	125.971	129.699	125.383	141.839	125.834		115.103	135.069	122.671	142.696	130.067	68.339*	118.667		130.121	115.253	118.78	104.274	111.763	116.613	132.648		125.348	121.268	116.239	117.452	117.96	127.758	122.541
110	123.633	138.158	118.789	135.325	115.986	118.605	136.981		126.725	132.951	126.398	129.305	132.883	65.986*	121.765		122.741	125.07	123.94	109.416	108.669	111.268	120.412		123.014	123.085	111.849	118.815	112.972	116.356	119.239
120	125.063	123.726	127.724	122.046	114.201	116.908	116.023		116.353	117.206	114.963	120.548	131.382	79.704*	138.025		134.956	120.364	127.074	109.748	114.187	128.96	122.473		131.881	111.62	122.287	120.448	115.789	117.234	126.554
130	134.959	140.254	146.366	134.624	124.674	141.051	126.37		119.017	123.075	120.512	138.277	134.632	72.269*	110.683		129.81	120.163	118.51	110.111	112.732	106.93	126.891		121.728	114.768	126.344	121.799	117.166	108.539	123.337
140	128.181	144.949	134.381	129.567	126.915	147.321	120.98		117.137	115.004	132.235	141.151	139.946	73.674*	119.476		116.514	112.886	119.923	113.873	115.977	115.39	125.935		123.484	109.219	113.968	120.783	118.679	113.017	131.771
150	124.799	131.674	120.596	118.534	111.979	140.135	117.449		114.428	127.858	118.687	120.414	129.19	83.035*	124.979		110.913	116.957	118.854	117.721	119.515	114.583	124.047		127.066	110.825	130.864	119.011	131.283	114.216	134.594
160	139.548	153.727	123.303	123.898	121.837	146.964	125.501		119.079	125.69	121.904	138.794	127.857	79.352*	110.223		110.855	129.693	126.214	124.964	123.624	114.618	121.518		122.84	111.531	142.675	120.78	128.413	110.466	136.79
170	126.06	139.002	121.621	121.395	115.975	141.852	121.035		117.026	126.97	128.146	130.938	127.117	74.509*	101.08		115.04	115.661	119.889	126.198	125.486	117.106	123.54		114.721	114.438	133.244	121.598	109.832	113.351	142.163
180	110.834	137.498	122.338	122.659	113.189	135.66	124.427		110.917	117.231	116.513	120.012	126.726	82.618*	126.697		123.615	113.606	110.961	124.979	111.794	110.949	134.937		122.267	113.771	136.285	117.622	102.832	112.894	122.761
190	122.439	138.436	117.914	128.881	118.091	140.283	123.019		118.357	124.39	120.937	137.598	131.721	83.62*	114.26		126.346	120.684	129.228	121.888	111.399	107.491	124.189		118.517	112.48	116.46	115.777	103.753	115.821	127.963
200	111.942	124.687	124.992	128.181	120.707	132	114.113		120.807	123.055	116.281	135.29	136.802	74.348*	109.532		118.469	115.885	117.879	118.548	116.825	110.287	128.422		122.532	114.745	111.445	128.1	104.775	109.174	115.076
210	125.095	112.965	121.439	122.085	105.574	125.429	116.214		109.782	118.129	126.919	141.632	127.11	80.567*	121.126		119.684	121.1	112.489	106.046	107.165	106.178	131.183		117.945	111.169	110.782	126.815	103.911	113.118	121.967
220	130.57	131.249	121.615	124.911	118.774	140.152	124.244		114.988	131.971	122.783	131.445	139.304	69.878*	113.783		123.59	124.753	122.61	110.789	102.596	116.256	125.868		114.38	110.804	116.93	133.999	109.434	111.004	119.643
230	125.331	123.758	116.646	118.475	111.146	127.787	118.375		109.704	117.217	118.977	145.733	139.611	66.74*	110.674		117.34	116.817	117.732	109.751	118.363	114.832	119.444		120.421	111.587	117.307	124.626	106.778	112.882	118.165
240	122.609	127.659	118.1	127.316	118.887	136.129	123.645		108.954	111.27	126.321	122.724	135.923	77.988*	128.441		131.51	121.024	115.047	109.272	129.186	110.951	133.676		117.19	112.369	113.352	124.514	109.571	113.151	120.083
250	136.132	128.696	123.027	123.585	120.181	141.908	129.34		113.23	122.37	134.922	136.964	146.492	65.322*	112.18		127.459	115.278	128.348	110.705	129.828	122.75	135.48		116.555	122.898	113.271	118.308	114.917	117.769	133.516
260	124.094	129.96	120.259	120.264	114.198	121.243	134.199		110.004	114.698	137.301	122.012	133.335	65.727*	119.33		117.245	113.908	139.587	132.154	125.193	112.045	135.312		131.691	115.867	133.945	124.404	118.801	113.821	121.148
270	120.943	120.797	119.531	120.955	113.212	129.817	118.255		107.668	109.587	134.22	133.045	131.324	76.902*	120.178		117.238	121.791	140.524	123.31	122.502	125.851	138.903		117.14	111.647	115.387	117.828	122.41	110.859	119.875
280	120.232	130.05	119.179	130.15	117.463	134.365	114.576		112.883	132.266	119.399	127.812	129.513	70.886*	122.098		126.12	122.451	141.088	114.356	106.395	130.391	142.245		119.128	105.619	129.592	121.092	107.388	117.134	123.121
290	123.211	123.444	128.361	133.239	103.423	128.81	116.207		106.553	122.541	116.592	130.324	131.207	66.879*	101.639		128.475	121.808	122.061	120.068	112.059	124.897	137.757		119.602	108.022	122.177	127.36	109.951	110.97	124.347
300	116.288	118.412	117.251	119.877	114.114	132.299	119.054		108.469	126.66	111.12	123.316	131.549	72.653*	102.705		138.267	121.672	116.046	125.088	126.571	129.162	140.03		114.479	113.04	111.11	125.351	115.204	113.764	129.964
Panel D- Diastolic BP
Time (min)	SDAP								SDFA								NSAP								NSFA
0	80.423	84.255	78.29	85.858	74.124	83.298	80.327		83.274	76.743	83.514	90.367	85.475	52.575*	80.838		85.108	85.143	81.543	80.628	76.193	73.617	82.426		82.44	78.98	98.094	99.136	80.448	77.504	87.328
10	93.736	92.763	89.226	90.885	93.488	95.98	94.341		91.447	100.228	91.424	92.077	95.835	61.115*	89.889		91.311	80.049	82.298	72.294	74.617	82.821	82.958		96.257	85.037	81.47	92.334	82.577	81.552	85.122
20	88.735	88.843	83.377	84.82	93.57	96.461	102.096		90.33	82.556	98.749	102.339	95.015	54.813*	91.75		95.475	81.617	91.667	78.851	87.286	75.44	80.354		76.309	81.264	96.695	91.023	79.128	80.395	99.34
30	95.358	78.734	87.155	86.225	88.254	87.918	77.678		90.295	82.181	82.818	87.633	93.003	60.755*	87.793		89.159	82.017	83.311	86.784	79.478	73.045	80.778		77.022	80.01	87.265	83.477	77.354	76.143	88.054
40	90.556	98.573	91.161	95.194	81.773	100.98	96.206		93.963	85.509	86.371	88.366	96.037	55.721*	86.153		82.794	91.837	84.403	76.548	76.079	80.24	89.88		78.489	74.948	80.477	85.737	71.837	80.51	92.542
50	82.85	93.613	92.11	102.129	91.546	101.731	81.408		91.146	81.963	87.976	93.49	83.154	49.4*	87.237		91.461	86.963	88.54	79.157	74.298	75.204	82.299		75.262	75.836	87.848	97.03	77.457	82.072	85.102
60	88.298	86.817	88.658	88.24	79.733	92.28	77.333		84.17	82.028	83.742	91.394	84.007	58.617*	88.016		79.097	83.38	82.259	80.884	70.464	83.787	92.774		81.472	77.19	83.702	93.763	80.261	79.895	94.109
70	96.651	96.472	88.129	86.28	90.833	100.507	85.561		84.579	89.882	88.698	90.37	87.681	61.689*	91.545		85.034	93.956	83.602	84.899	76.313	72.893	82.978		78.38	75.574	86.634	93.031	80.48	78.588	86.137
80	97.585	96.467	88.141	83.758	86.035	91.177	94.034		78.148	88.356	97.24	85.228	82.533	54.023*	100.7		84.988	80.047	91.469	85.135	84.485	80.354	84.434		85.04	76.252	86.86	95.379	80.389	85.205	86.231
90	88.956	87.27	82.573	83.503	94.406	89.844	90.986		72.711	82.271	89.995	81.619	87.123	60.862*	87.763		84.007	84.806	91.657	78.832	83.543	86.603	79.49		78.765	84.135	90.288	93.186	80.579	80.197	83.058
100	91.141	97.226	88.914	91.354	88.517	99.997	89.638		80.088	95.46	90.284	97.661	85.514	54.588*	86.414		95.234	78.163	82.95	74.686	75.645	80.124	86.024		80.909	83.177	79.919	84.553	83.38	91.817	81.885
110	84.076	88.985	82.629	94.874	80.753	81.051	97.969		89.189	93.374	89.45	90.401	85.628	48.048*	87.605		88.04	85.974	85.364	79.632	72.998	75.385	79.775		82.419	84.265	78.036	85.18	79.841	83.188	84.64
120	87.012	79.059	88.06	83.789	79.167	79.734	79.418		81.944	80.327	82.151	82.141	83.869	60.033*	96.6		98.698	81.071	90.174	78.996	76.583	90.69	80.59		92.131	77.046	85.244	86.547	77.773	82.78	88.529
130	92.306	93.747	103.427	95.887	88.307	97.411	90.592		84.11	85.827	85.849	97.069	87.175	58.174*	78.145		93.106	80.582	83.095	77.866	74.429	72.458	85.194		79.979	80.415	87.844	86.506	76.057	76.761	83.551
140	85.741	97.304	92.606	89.465	88.681	103.183	82.478		82.367	80.338	92.58	101.615	88.816	54.749*	86.258		84.254	73.8	84.154	79.741	78.193	78.686	83.861		81.17	76.323	80.307	85.705	80.342	81.609	91.789
150	84.348	87.029	80.384	80.754	76.684	99.342	81.929		78.002	90.858	83.672	82.66	81.876	59.615*	86.393		80.144	79.846	82.176	80.976	80.222	78.127	83.387		85.887	76.888	90.809	86.486	91.782	83.101	92.13
160	97.716	105.22	83.08	86.25	83.939	100.538	89.681		84.501	86.04	89.217	96.764	81.176	59.142*	77.078		80.334	90.361	84.929	89.31	84.675	79.685	82.648		81.05	77.806	102.836	86.098	89.457	78.231	92.057
170	87.485	93.013	82.634	81.065	79.578	97.523	84.833		78.555	90.582	91.165	89.373	82.495	54.271*	69.318		83.564	78.042	83.284	89.927	85.194	78.59	83.997		77.192	77.135	93.601	89.816	75.268	81.312	99.693
180	73.804	93.707	84.064	84.211	76.964	94.027	83.832		74.61	83.609	82.25	84.836	82.166	60.814*	87.612		91.542	78.067	78.355	88.405	74.95	77.043	89.663		80.443	77.564	96.397	84.998	70.633	82.029	84.005
190	81.463	94.777	80.613	87.954	81.794	96.547	88.089		83.713	86.914	86.202	97.822	83.661	65.9*	79.645		92.6	85.309	94.005	86.94	75.15	72.709	81.949		80.973	78.523	79.888	84.565	72.031	83.351	88.411
200	71.772	78.279	84.605	90.137	83.266	91.163	77.247		84.316	87.934	81.837	94.076	90.588	54.332*	75.563		80.84	81.716	83.138	85.35	80.141	77.387	88.322		81.695	78.995	77.895	90.906	71.814	79.069	80.628
210	84.212	72.158	83.456	83.278	72.503	85.841	80.548		76.174	79.161	88.412	101.001	81.234	59.345*	86.246		87.356	85.123	78.701	76.249	72.032	72.838	92.68		77.55	77.719	75.271	92.079	71.437	83.236	82.6
220	89.774	85.433	83.811	85.692	83.177	99.573	87.142		82.738	92.051	87.895	91.372	94.457	53.711*	79.768		87.662	89.426	84.971	77.738	68.526	79.986	86.24		76.606	78.773	79.963	97.18	76.199	79.131	82.882
230	82.689	79.68	80.24	78.851	75.827	86.126	82.82		77.861	81.267	83.62	101.061	93.07	50.998*	77.734		85.788	80.394	78.779	76.907	79.896	77.074	80.703		77.465	79.765	81.767	92.48	74.283	82.099	81.385
240	78.873	83.773	80.163	88.696	81.708	91.684	87.764		76.616	77.193	89.989	81.133	89.951	58.119*	87.274		96.517	86.068	80.606	75.937	90.184	75.823	89.575		78.1	78.125	77.275	90.374	74.486	80.086	81.064
250	95.045	81.155	84.02	83.875	85.146	96.786	94.687		82.207	84.22	99.01	95.899	99.876	49.267*	78.784		89.164	81.52	91.767	74.526	89.425	84.783	91.515		77.421	83.67	77.179	84.732	79.11	84.833	92.661
260	84.042	82.892	80.595	83.611	78.894	81.199	97.328		79.498	79.687	99.91	83.707	85.352	49.404*	82.913		83.765	80.417	97.102	95.828	87.623	77.748	93.34		90.92	81.388	93.493	88.434	83.363	82.757	81.953
270	83.381	77.879	82.461	82.464	76.822	85.555	82.853		75.205	75.83	97.392	87.304	83.498	59.513*	84.984		85.026	87.206	97.282	88.306	85.051	87.662	96.748		79.215	76.768	79.49	86.015	84.102	79.177	84.825
280	82.686	84.501	80.519	91.277	82.213	90.691	78.858		82.197	94.279	83.68	85.073	83.755	54.98*	88.76		88.742	85.65	100.035	80.087	70.36	93.543	96.093		79.291	72.839	91.126	86.396	74.024	84.951	83.914
290	83.179	79.188	87.941	93.623	69.205	88.194	78.871		76.463	86.709	82.349	90.126	83.297	51.485*	70.348		90.878	85.933	84.1	81.564	76.233	83.431	95.471		82.477	76.193	84.678	90.476	77.779	79.512	83.961
300	80.54	76.361	77.251	81.67	78.882	86.943	83.032		76.247	91.262	78.178	83.735	84.317	52.771*	70.158		102.209	85.546	80.292	88.732	86.926	89.586	96.79		79.023	79.102	76.727	90.811	78.595	83.307	86.796
Panel E-Mean arterial pressure
Time (min)	SDAP								SDFA								NSAP								NSFA
0	95.175	103.828	93.614	102.926	89.38	100.34	94.762		97.987	93.409	98.583	108.675	104.298	63.413*	95.72		99.764	101.646	97.938	94.019	91.196	88.916	101.406		98.789	96.529	115.314	115.16	96.014	89.86	104.927
10	109.826	113.23	105.728	107.35	110.558	114.957	111.234		105.594	117.967	107.639	111.734	116.669	69.863*	104.964		107.028	96.842	98.293	85.853	89.658	99.233	100.553		115.06	100.607	97.133	108.876	98.563	95.281	104.925
20	107.039	109.419	100.618	101.867	107.968	114.78	118.826		104.617	98.833	114.66	121.175	114.979	62.279*	107.938		108.801	96.797	109.531	93.248	103.579	91.24	98.406		93.087	96.749	114.878	106.379	93.643	93.604	117.984
30	113.231	97.099	103.754	103.58	104.803	106.24	94.704		106.667	98.872	99.059	106.837	113.202	71.016*	104.932		104.435	99.554	98.852	100.57	94.727	88.913	98.561		95.293	95.042	102.878	97.982	92.572	88.94	106.805
40	109.526	118.664	107.628	111.676	98.14	120.136	112.088		108.829	102.507	101.125	106.406	115.493	62.779*	101.365		98.949	108.581	101.03	90.352	91.986	96.268	106.534		95.675	90.739	96.906	100.697	87.857	93.557	111.545
50	100.377	114.486	108.975	119.536	107.408	120.561	96.208		107.135	97.302	102.361	111.539	101.342	57.505*	101.996		105.126	104.678	105.035	94.685	89.834	90.803	100.656		93.472	90.691	102.743	115.194	91.492	95.739	102.78
60	104.988	106.953	105.982	105.525	95.776	110.736	91.244		99.481	97.263	97.4	108.869	102.558	65.61*	102.256		92.843	100.093	97.609	97.19	84.973	99.177	112.652		100.449	92.531	100.001	110.682	96.496	92.887	110.98
70	116.188	118.123	105.227	103.615	108.406	119.497	101.449		99.033	109.118	103.092	108.095	106.884	68.623*	105.95		98.699	112.231	99.609	100.845	91.863	88.364	99.224		95.763	93.796	102.14	109.926	94.242	93.005	101.714
80	115.444	117.715	105.586	99.448	100.175	107.575	110.714		91.972	104.864	113.35	102.146	100.937	61.129*	116.804		97.657	96.961	109.282	99.052	101.364	95.361	101.337		103.928	91.151	102.41	112.759	95.765	98.611	102.921
90	105.901	107.23	99.942	98.888	111.156	107.145	108.354		87.07	98.259	106.081	98.316	107.229	69.001*	104.376		98.258	103.041	110.231	92.645	99.904	102.95	96.416		95.087	101.777	107.636	108.933	95.021	93.628	100.923
100	112.435	119.206	104.898	107.971	105.456	118.604	106.299		94.822	112.846	104.122	117.89	104.954	60.333*	100.568		110.385	94.078	98.439	87.648	91.313	96.253	106.896		99.911	99.955	95.577	99.224	97.863	108.244	100.545
110	102.234	110.432	98.308	112.5	96.205	97.084	115.812		105.71	111.402	105.915	107.435	105.541	55.358*	103.298		102.725	102.804	102.333	92.509	88.242	91.24	96.588		99.631	101.866	92.582	99.969	93.977	97.674	99.897
120	104.247	98.449	104.911	100.799	94.708	95.956	95.838		96.366	96.498	96.272	98.52	104.763	68.632*	115.476		115.129	98.737	106.095	92.315	92.428	107.854	98.353		107.781	92.09	101.497	101.511	94.425	98.473	105.583
130	111.168	114.356	122.648	113.503	103.946	117.249	106.316		98.558	102.348	100.716	114.437	107.684	63.787*	92.537		109.843	98.589	98.531	92.607	90.978	87.685	102.346		97.245	95.288	105.2	102.045	94.185	90.922	100.705
140	105.03	118.507	111.455	107.001	104.936	123.079	99.716		96.906	95.339	110.646	118.918	111.364	62.59*	101.211		98.26	90.782	99.245	94.521	94.684	94.755	102.057		99.435	90.319	94.77	102.321	96.99	95.331	109.725
150	102.659	106.971	98.348	96.872	92.03	118.163	97.63		93.088	106.929	99.316	98.874	102.96	69.775*	102.943		93.195	95.975	98.032	97.332	97.113	93.687	100.238		103.211	91.287	108.12	100.381	109.508	96.917	111.469
160	116.246	127.124	100.226	103.183	100.581	121.677	105.927		99.113	103.842	103.793	115.099	101.629	67.898*	91.553		93.268	106.981	103.3	105.064	102.224	94.667	98.571		98.775	92.084	121.544	101.728	106.745	92.356	112.131
170	104.71	113.541	99.504	98.934	94.954	117.277	100.696		94.986	106.653	107.403	107.377	101.799	63.084*	83.055		97.003	94.517	99.123	106.198	101.455	95.458	100.138		92.974	93.325	112.007	103.497	90.446	95.289	118.426
180	90.233	113.618	100.953	100.971	92.372	112.666	102.444		89.706	98.031	97.03	99.962	101.435	70.729*	104.887		104.89	93.371	92.082	104.881	90.707	92.356	108.989		98.676	93.058	114.646	99.523	84.939	95.481	101.975
190	99.687	114.017	96.544	105.984	98.036	115.858	103.599		97.939	103.413	101.396	113.964	104.508	73.698*	94.661		106.903	100.299	109.272	103.034	90.883	88.68	99.451		96.433	92.914	96.404	98.419	85.84	98.036	105.312
200	89.017	98.881	102.568	107.127	99.038	109.735	93.974		99.799	103.015	96.559	112.415	110.769	62.922*	90.351		96.9	96.454	98.258	99.537	95.632	92.091	105.211		99.508	94.873	92.33	107.931	85.801	92.366	96.108
210	102.51	90.205	99.276	100.21	86.827	104.225	96.413		90.171	96.392	105.913	118.782	102.209	69.017*	101.965		101.355	100.702	93.578	89.108	87.293	87.548	108.524		94.565	92.607	90.785	107.429	85.635	96.595	99.389
220	106.695	105.627	100.406	102.802	98.887	117.748	103.763		96.04	109.498	101.704	109.38	114.445	60.578*	94.452		103.769	104.615	101.695	92.365	83.56	96.649	103.125		92.369	92.798	95.767	113.57	90.74	93.561	98.67
230	102.278	99.109	95.832	96.443	91.145	104.955	98.632		91.354	96.788	98.189	120.603	113.726	57.659*	91.81		99.485	96.055	96.107	91.078	96.082	93.576	97.111		95.54	93.586	97.228	106.774	88.178	95.743	97.172
240	98.75	103.788	96.495	105.884	98.463	112.08	103.898		90.405	91.75	105.266	98.909	109.751	67.706*	106.047		111.213	101.327	95.312	90.549	106.429	91.163	108.355		94.504	92.46	92.306	105.497	89.697	94.476	98.901
250	113.46	101.901	100.785	101.018	100.671	116.77	110.154		94.899	100.614	114.626	113.697	120.387	55.984*	93.372		105.774	95.998	107.983	90.718	107.461	101.166	109.712		93.189	101.555	92.566	99.108	94.449	100.023	110.597
260	102.009	103.252	97.942	99.171	94.075	98.607	114.1		92.142	94.528	116.402	100.336	106.466	56.176*	99.303		98.068	95.03	116.294	111.835	104.709	92.771	111.998		107.109	95.822	111.307	105.146	98.83	96.481	98.571
270	100.399	96.937	99.001	99.492	92.245	104.911	98.379		88.836	90.135	113.785	106.987	104.146	67.075*	100.559		98.692	101.149	116.78	103.457	102.166	105.128	114.919		94.71	93.025	95.089	99.849	101.093	93.372	100.208
280	99.054	104.644	97.06	108.624	97.76	109.085	94.744		94.898	111.093	99.326	103.643	103.551	61.79*	103.902		105.561	101.436	118.783	94.681	85.646	110.173	116.059		96.288	87.021	107.371	101.833	88.458	99.241	101.21
290	101.318	98.569	105.734	110.895	84.499	105.901	95.716		88.867	102.587	97.076	107.72	103.915	57.919*	83.808		107.529	101.105	100.946	98.852	91.168	102.012	114.196		98.357	90.036	100.088	106.516	91.499	93.151	101.492
300	95.938	95.322	94.946	98.788	93.598	107.197	99.172		89.685	106.398	92.372	101.143	105.051	61.604*	84.522		118.639	100.697	95.535	104.978	103.09	107.103	116.048		93.954	93.358	91.439	105.716	94.389	96.692	105.913

## Sheet: Fig S5-1+1
Panel A HR	SDAP							SDFA							NSAP							NSFA
0	344.973	373.857	286.023	314.743	327.236	293.108	334.375	374.917	361.669	284.605	300.377	339.248	333.497	305.346	345.06	307.547	394.66	322.797	351.036	366.589	368.699	354.976	263.224	367.256	385.008	335.484	337.303	354.038
10	337.675	380.12	330.888	306.138	315.56	330.288	402.629	317.99	330.14	286.656	365.966	359.439	365.269	310.87	330.752	358.425	384.171	307.753	309.703	344.575	297.955	361.546	300.79	383.428	372.706	334.653	339.04	388.814
20	344.024	426.08	345.519	351.545	331.304	333.103	390.232	321.899	322.696	350.571	276.259	388.024	376.675	324.021	324.406	361.106	397.177	337.084	292.997	356.763	301.892	375.879	260.133	382.359	374.431	329.447	322.698	333.914
30	315.224	335.037	292.638	307.687	334.703	376.279	314.02	343.415	348.2	386.008	315.48	362	373.427	334.596	312.7	363.755	321.087	296.68	304.528	340.074	334.571	307.795	264.924	312.768	390.349	342.739	362.228	334.15
40	311.198	334.044	329.291	320.598	372.14	357.615	361.491	374.88	445.139	340.915	315.022	354.471	384.314	302.442	337.489	374.007	316.647	323.656	309.968	332.848	301.901	297.326	314.623	311.908	379.715	329.022	386.88	330.736
50	301.084	344.065	378.808	301.108	430.481	338.116	382.287	375.031	400.68	386.402	290.035	323.608	407.829	288.271	314.231	365.605	313.561	352.935	316.861	323.58	300.839	333.344	305.208	349.28	347.244	348.802	393.86	332.042
60	294.385	329.913	335.506	307.723	403.52	304.059	331.902	339.617	393.097	379.818	368.844	323.563	404.152	307.728	310.317	362.659	338.569	332.968	292.633	330.709	315.54	322.155	315.631	391.168	323.055	344.041	374.124	348.112
70	304.043	340.554	308.333	389.924	447.224	289.365	369.138	325.061	392.947	297.481	386.182	322.256	394.934	326.235	305.418	358.644	325.172	291.739	357.254	312.743	282.66	299.388	321.551	329.709	357.828	403.531	381.814	313.09
80	308.988	344.893	382.87	411.206	453.54	402.807	431.042	383.778	389.06	292.718	371.237	335.886	392.812	383.624	435.4	315.31	314.466	322.412	349.062	327.72	316.289	349.34	343.128	342.201	326.513	444.212	380.509	327.966
90	370.228	441.605	338.767	366.151	414.87	387.636	370.132	383.773	420.027	355.472	371.558	367.307	368.835	436.375	402.917	310.369	418.366	356.402	361.415	311.983	388.177	300.521	382.047	383.199	341.503	386.724	378.358	366.54
100	374.855	427.032	360.506	382.941	437.918	351.877	404.281	415.024	352.779	288.66	384.1	364.507	390.52	400.608	378.813	329.631	403.627	346.257	359.781	384.386	423.41	336.039	294.123	394.351	391.84	397.628	355.221	371.355
110	373.709	423.22	337.638	378.396	432.474	377.682	450.346	366.804	389.53	396.152	380.006	340.728	389.918	424.213	419.863	413.819	349.835	306.868	346.693	393.321	451.925	382.493	285.087	396.857	329.297	421.703	394.737	353.817
120	378.11	414.518	366.586	389.859	416.576	338.972	483.14	395.26	444.843	360.424	399.267	359.998	395.491	395.874	391.662	379.049	391.703	323.578	355.162	386.602	368.932	406.524	284.592	451.579	399.458	435.597	399.246	394.094
130	369.885	438.205	365.46	344.043	443.068	330.681	442.113	446.6	459.317	349.177	420.655	362.116	400.435	389.258	412.707	380.847	418.368	348.628	391.298	352.193	410.028	428.376	328.451	424.375	415.601	413.849	408.412	421.743
140	410.568	450.905	367.275	371.617	455.479	360.307	459.381	422.012	429.679	357.957	441.014	406.659	410.639	344.998	397.285	402.698	421.649	318.502	376.477	364.039	384.544	404.827	334.18	364.366	426.323	434.731	425.168	418.867
150	408.717	463.095	404.863	382.737	442.065	351.612	423.659	448.264	444.019	376.861	445.767	350.895	401.77	344.741	378.676	416.196	388.065	353.299	337.841	374.898	404.876	418.813	294.63	412.646	430.058	414.485	446.585	399.819
Panle B SBP	SDAP							SDFA							NSAP							NSFA
0	128.464	145.968	110.613	116.315	123.445	126.442	112.031	125.202	130.005	115.179	115.139	131.054	73.483*	104.81	124.034	108.706	133.132	108.371	128.373	126.386	128.557	125.037	115.919	122.139	129.672	110.029	117.814	134.084
10	128.006	130.17	130.978	112.863	118.473	133.101	132.651	119.244	117.732	114.687	114.756	153.277	82.887*	106.51	125.9	126.058	131.278	110.702	120.62	122.226	125.462	127.712	114.913	129.539	131.216	112.632	105.597	141.956
20	123.844	130.317	122.769	113.839	121.854	138.253	134.2	123.402	116.827	133.354	114.318	131.747	80.74*	110.648	124.05	123.867	131.525	117.961	117.104	116.106	122.676	129.119	113.403	128.798	122.388	108.461	109.839	130.295
30	119.414	118.823	114.478	114.749	133.013	132.956	115.428	119.952	130.471	132.43	119.959	140.278	81.499*	108.597	115.368	131.14	119.502	113.231	113.017	131.643	130.005	116.01	114.451	112.969	130.037	113.659	115.272	118.775
40	122.597	111.924	120.518	117.972	121.607	128.046	134.438	113.123	144.245	131.387	126.28	122.011	86.152*	104.719	125.824	126.621	110.836	111.561	125.737	111.192	120.749	114.45	125.32	112.981	131.312	106.966	120.054	129.137
50	115.657	113.447	120.818	117.538	133.967	127.548	133.095	126.913	139.66	139.347	119.044	119.061	80.057*	105.189	130.041	120.85	114.912	129.425	124.805	115.878	128.199	124.827	127.821	130.25	118.176	107.798	123.115	123.557
60	113.261	121.596	123.723	115.048	129.854	125.196	118.465	117.418	135.302	123.317	124.619	128.317	79.175*	103.838	123.715	121.459	117.632	114.808	119.195	117.706	121.683	116.049	131.254	137.897	106.125	118.93	124.673	126.449
70	111.806	130.635	128.422	134.52	126.787	122.95	129.317	111.988	138.116	114.604	138.235	120.079	83.156*	113.954	122.45	120.81	111.769	111.033	127.444	114.781	117.201	113.917	123.26	114.534	110.851	127.074	119.691	123.997
80	119.236	126.168	131.662	127.849	135.857	134.407	139.146	122.345	130.812	112.045	132.475	140.034	86.667*	120.761	135.652	114.107	114.226	118.838	130.066	112.921	120.424	123.6	125.961	121.934	115.511	128.979	115.693	124.608
90	128.443	139.704	121.735	123.187	125.604	138.319	141.672	127.496	142.859	122.495	127.051	133.418	82.564*	130.687	121.377	115.816	132.105	122.684	129.193	114.68	140.145	117.189	127.018	131.145	119.723	122.972	122.165	141.434
100	117.652	125.336	127.411	130.055	130.804	131.89	125.614	128.654	124.607	114.406	122.913	135.517	79.548*	129.443	133.462	124.549	137.083	120.451	127.351	121.328	141.613	124.776	120.115	133.405	130.913	128.226	113.126	138.668
110	134.853	138.52	127.11	126.101	136.626	138.812	131.827	122.581	128.311	133.587	130.238	126.946	76.224*	124.257	135.272	133.578	130.803	105.441	131.472	132.235	150.3	132.118	117.721	128.746	120.018	119.516	117.062	135.485
120	122.709	133.221	125.657	130.632	133.937	124.436	133.077	129.8	139.206	126.664	128.391	139.761	81.146*	130.236	134.469	133.124	127.097	116.317	129.673	133.484	142.115	137.979	115.834	146.051	131.012	123.405	122.023	139.627
130	121.899	131.71	135.676	127.287	126.907	125.072	124.707	133.222	139.503	122.726	144.548	142.501	80.028*	113.74	140.074	129.219	129.998	118.139	142.448	127.057	127.048	131.333	124.947	136.447	131.973	115.216	128.149	125.374
140	120.785	140.824	122.542	121.244	135.525	136.004	129.2	129.927	138.833	131.239	128.775	155.066	86.185*	117.302	127.983	127.422	128.025	110.376	129.607	117.722	129.007	138.964	125.02	123.448	137.084	128.392	126.742	140.651
150	122.17	130.773	126.388	127.474	124.246	125.418	120.133	134.602	134.097	126.513	135.043	130.939	99.431*	103.936	127.357	135.127	117.43	121.501	125.327	118.014	135.026	135.431	117.013	129.605	128.027	113.468	120.234	126.815
Panel C DBP	SDAP							SDFA							NSAP							NSFA
0	91.728	99.099	77.522	80.741	84.785	90.934	78.782	91.359	93.532	82.184	80.742	90.654	57.612*	72.663	85.968	76.723	90.413	74.738	88.631	87.583	89.175	88.032	80.615	86.61	96.381	77.92	83.421	89.71
10	93.675	90.943	92.604	78.461	82.463	94.719	98.064	84.585	83.225	82.716	80.656	107.266	69.187*	74.242	90.897	89.719	93.052	76.77	82.882	85.902	81.746	89.371	80.812	89.444	96.152	80.926	76.618	97.607
20	88.423	90.287	85.925	78.153	86.624	95.551	97.019	88.49	81.165	95.37	77.518	90.959	65.81*	76.692	90.704	88.349	92.916	84.312	78.929	81.421	81.489	90.259	79.129	90.295	91.842	77.502	80.256	90.79
30	81.509	80.466	80.162	80.734	93.544	92.706	81.428	85.753	90.804	95.707	85.89	93.221	66.636*	76.791	84.224	95.317	82.111	80.759	75.981	93.362	87.625	78.581	80.7	77.037	97.219	81.122	83.305	84.688
40	86.789	76.883	84.909	82.986	84.825	90.22	96.649	82.373	101.831	95.619	87.991	80.892	70.533*	74.482	90.983	91.792	79.055	80.553	84.417	76.854	79.79	79.322	86.403	78.339	98.753	76.31	87.346	92.06
50	81.815	77.005	82.822	82.335	96.651	89.656	94.104	93.339	97.71	101.503	84.097	79.777	64.632*	74.778	93.955	88.259	80.925	93.305	84.584	80.437	86.506	86.781	91.042	91.496	89.37	76.307	90.322	88.314
60	79.684	80.71	86.941	81.15	92.704	86.03	85.005	82.565	94.144	86.392	91.278	88.458	65.431*	73.852	87.574	88.002	80.723	82.766	81.88	82.699	80.698	79.536	94.645	99.051	77.971	83.52	90.999	86.521
70	78.379	88.672	88.871	94.599	89.271	82.791	93.275	80.476	97.882	80.423	99.656	81.335	70.911*	81.198	89.872	88.951	76.68	80.758	89.209	80.136	78.848	78.934	88.204	79.381	82.893	92.048	87.068	85.307
80	84.203	86.203	91.373	89.723	98.045	95.932	101.137	90.296	91.828	79.383	93.829	92.489	73.795*	88.886	99.806	80.628	80.665	86.78	88.257	77.191	80.565	85.63	89.829	86.035	85.519	93.439	86.521	85.4
90	90.761	98.48	85.763	85.471	89.091	96.997	102.789	94.5	99.269	87.61	88.837	89.927	68.907*	98.114	83.372	80.807	93.968	88.389	88.085	80.206	97.568	81.086	90.71	93.388	88.315	87.872	89.526	96.034
100	83.891	84.496	89.226	92.318	93.466	91.828	91.778	92.863	86.057	82.11	87.229	91.249	66.376*	96.018	95.885	88.249	99.108	87.795	87.556	84.292	101.134	86.881	84.382	93.61	96.637	93.712	83.167	94.952
110	98.484	94.866	88.309	89.073	99.8	98.217	99.243	87.328	91.069	96.218	93.708	88.008	64.034*	90.322	95.807	96.599	91.466	75.692	89.734	93.081	106.643	92.253	82.237	91.719	88.618	86.268	85.028	92.188
120	88.514	91.58	90.612	92.81	96.425	87.515	99.051	93.741	99.751	90.93	90.551	97.796	67.039*	95.88	98.531	96.095	89.666	84.369	89.966	94.399	99.679	97.324	80.119	105.582	97.221	91.132	89.945	99.11
130	89.458	92.377	94.923	88.771	90.903	89.158	91.282	96.394	97.28	85.904	104.66	98.52	65.891*	81.618	100.378	92.985	94.25	85.949	98.291	89.967	86.476	96.02	87.526	97.166	99.897	85.302	92.6	92.628
140	86.728	98.25	85.866	84.919	98.446	96.076	96.087	95.006	97.219	93.334	93.822	109.551	67.944*	85.818	92.471	92.024	92.293	80.632	90.034	82.684	90.084	100.013	88.47	83.905	102.357	93.15	93.97	104.919
150	90.795	88.267	90.238	92.186	88.895	88.907	86.923	98.65	96.506	89.414	97.892	88.453	79.628*	78.544	90.655	99.268	83.732	87.68	86.413	85.92	95.333	97.549	81.621	90.186	96.989	83.001	91.281	95.617
Panel D MAP	SDAP							SDFA							NSAP							NSFA
0	108.389	118.01	91.373	96.351	101.909	106.692	93.212	106.298	109.195	95.675	94.82	108.656	64.641*	86.515	103.457	90.454	109.251	89.868	106.346	105.222	105.919	103.568	95.074	102.839	110.856	91.591	98.543	109.662
10	108.916	108.399	109.638	92.955	98.359	111.957	113.407	99.251	97.819	95.706	95.519	127.609	75.527*	88.261	105.724	104.898	109.672	91.602	99.01	101.679	100.337	106.412	95.241	107.857	111.876	94.657	89.21	118.05
20	104.371	108.093	102.249	93.416	102.556	114.333	113.045	102.622	96.804	112.108	92.735	108.913	72.332*	91.841	105.29	103.929	110.192	98.902	94.828	96.735	98.214	107.017	93.529	107.237	105.137	90.737	92.957	108.262
30	98.287	96.436	94.704	95.066	110.871	109.964	96.314	100.353	107.46	111.636	100.519	114.377	73.436*	90.604	98.141	111.439	97.986	94.49	91.972	110.393	105.827	94.423	95.081	92.494	111.257	95.081	97.29	99.924
40	102.224	91.436	100.748	97.841	101.273	106.903	113.414	95.681	120.921	111.748	103.542	99.704	77.56*	87.408	106.341	106.737	92.564	94.366	101.507	92.253	97.035	93.676	104.126	92.908	113.085	89.382	101.931	107.344
50	96.418	92.753	99.836	97.412	113.763	105.967	111.488	107.804	116.916	118.478	98.506	96.736	71.891*	87.695	109.297	102.355	94.789	108.823	101.298	95.818	104.085	102.16	107.511	109.233	101.997	90.231	105.203	103.793
60	93.538	98.559	102.708	95.544	109.942	103.002	99.402	97.684	112.629	103.197	105.909	105.575	71.767*	86.774	103.008	103.088	96.392	97.524	98.172	97.736	98.112	94.613	111.242	116.669	90.216	99.139	106.511	104.828
70	92.316	106.224	105.469	112.446	106.296	99.696	109.083	93.77	115.846	95.068	115.948	98.157	76.501*	95.083	103.518	102.07	91.797	93.579	105.478	95.315	94.474	93.528	103.544	94.821	94.646	107.836	101.349	101.903
80	98.969	103.153	109.609	107.082	114.704	112.283	118.118	103.684	108.515	92.835	110.728	113.262	79.619*	103.371	115.297	94.977	95.046	99.465	106.873	93.07	97.563	101.79	106.038	101.928	98.286	109.603	99.462	102.266
90	107.593	116.395	101.677	101.791	105.546	114.847	119.704	108.487	118.737	102.567	105.748	109.211	74.488*	113.002	100.252	95.409	110.896	103.674	106.682	95.274	116.301	95.703	107.175	110.39	101.784	103.446	103.588	116.361
100	99.246	102.792	106.559	109.045	110.464	109.729	106.468	108.064	102.725	95.747	102.492	110.849	71.989*	111.094	112.849	103.209	116.06	102.498	105.655	100.637	118.805	101.818	100.425	111.785	111.697	109.136	96.051	114.915
110	114.431	114.641	105.049	104.638	116.282	116.457	113.874	102.682	106.569	112.633	109.159	104.841	69.385*	105.736	113.245	112.52	108.641	88.482	107.655	110.789	125.662	108.89	97.321	108.239	102.067	100.769	99.796	111.567
120	103.625	110.269	105.728	109.326	113.514	103.115	113.788	109.8	116.778	106.886	106.277	116.552	73.163*	111.059	114.032	111.386	105.521	97.549	107.487	112.16	118.271	115.183	95.656	124.386	112.065	105.385	103.778	117.519
130	103.281	109.691	112.706	105.07	107.876	104.08	105.94	112.267	115.625	102.253	121.684	118.256	72.054*	96.247	117.962	109.315	110.538	100.499	118.081	106.226	104.114	110.995	104.654	115.478	113.632	98.304	109.517	107.083
140	101.751	117.164	101.792	100.533	115.127	113.095	110.622	110.175	115.923	110.618	109.436	129.371	75.836*	99.264	107.93	107.383	108.094	93.539	107.299	98.088	106.988	116.519	105.016	100.642	117.332	108.935	108.607	120.302
150	104.19	107.255	106.126	107.645	105.014	104.841	101.244	114.554	113.057	105.812	113.648	106.912	87.803*	89.901	106.808	115.037	97.93	102.811	103.178	99.577	111.752	113.721	97.324	107.935	110.658	96.609	104.182	109.112
Panel E Activity	SDAP							SDFA							NSAP							NSFA
0	0.9	0.1	0	0.1	1	3.4	0	3.4	0.3	0.7	0.1	1.4	1.8	1.3	0.3	0	2.2	0	12.2	8.9	6.5	0.6	0	1.7	4.6	0	10.6	7.8
10	6.7	0.4	0	0	0	7	1	0.6	0	0.1	1	0.1	2.3	0	0	0.5	5.6	0	3.4	7.3	12.6	17.8	0.1	1.2	11.8	0.6	0.5	8.5
20	3.9	7.4	0.6	0.1	0.5	14.2	8.3	0	0.2	0	2.3	2	6.3	0	0.7	6.2	10	0	0.2	2.8	0.9	8.2	1	5	6.2	0	0.2	2.1
30	5.6	6.3	3	0.1	0.6	9.9	5.9	0	0.7	4.8	0	4.9	11.4	0	0.9	9.7	3.7	0	0.1	11.4	0	8.7	0.4	7.1	16.5	0.5	0.2	0.1
40	0.7	0	0	0	3.5	29.9	3.5	0.2	2.3	5.2	0.1	7.6	4.8	0.3	0.1	11.8	1	0	0	5.3	0	0.1	9.3	0.5	4.8	0	5.8	0.2
50	0.6	0	0.2	0	3.5	11.8	10.5	3.5	4.4	4	10.4	1.3	3.4	0.6	6	11.9	0	0	0	3.5	0.1	0.1	9.2	0.3	10.3	0.4	4.1	1.5
60	0.4	0.9	2	0.4	3.6	13.6	3.8	7.7	4.8	3.9	0.4	0.4	14.7	0	0.3	7.3	0	1	0.1	0	0.1	1.8	6	8.1	0.7	0.3	8	0
70	0	1.8	0	0	3.6	1.2	1.2	2.6	2.1	1.1	4.4	1.8	15	0	0.5	2.4	0	1.6	0.2	0	0.6	0.8	8.4	10.1	0.2	4.6	2.4	1.5
80	0.2	0.1	1.2	5.8	9.7	3.8	11.3	0.2	0.4	0.1	4.7	0.4	8.3	3.3	2	0	0	0.2	16.7	0.6	0	3	9.5	0.9	1.7	10.7	15.6	0.5
90	4.5	0.3	4.6	7.9	8.3	8.1	5.3	3.9	3.3	0.2	4.4	0.4	6	11.3	3.4	0.1	2.5	1.2	22.6	0.1	1	4.1	1.1	1.2	0.1	14.3	7.7	12
100	9	1.2	6.5	6	5	10.5	14	27.4	2.4	2.2	12.6	5.7	1.9	4.3	9.2	1.5	13.4	6.4	1.8	1.1	9.6	0.2	2.4	0.4	2.7	10.1	6	1.7
110	5.9	5.1	5.5	4.6	3.1	18.1	1.5	6.1	0.2	0.6	9.4	0.7	15.8	4.7	6.5	2.2	10	12	11.7	12.8	3.2	2	0	3.8	1.3	11.5	1.5	1
120	5.3	6.3	3.3	1.1	7.8	8.4	10.6	3.9	3.3	0.8	1.4	0.2	9.1	7.9	4.8	9.4	6.5	0.7	3.2	15.4	4.7	1.7	0.2	5	0.5	6.5	4.6	9.1
130	7.5	5.5	1.7	6.5	5.4	0.4	8.5	0.4	8.7	6.2	10.2	3.9	10.1	9.5	5.2	7.7	13.4	0	7.6	10.3	9.2	14.8	2.2	5.5	2.4	4.9	1	6.2
140	12.8	8.7	6	0.4	7.7	8.9	12.2	3.8	4.1	3.4	5.7	2.3	3.7	4.1	5.8	8.5	4	1	9.3	7.9	22.6	3.3	3.1	4.6	7.4	6.4	8.8	3.9
150	7.4	13.1	5.7	1.7	10.8	15.3	15.5	4.2	13.2	3.6	8.4	7.3	12.9	4.3	5.1	8.9	2	1.2	18.1	3.4	1.6	12.5	1.1	5.4	5.1	7.6	3.7	15.7

## Sheet: Fig S6 transition day 1 freq
A-HF
Time (min)	NSFA							NSAP							SDFA							SDAP
0	1.57	0.33	31.12	1.5	0.59	0.87	0.53	0.18	1.23	0.71	1.92	3.35	1.22	2.06	2.39	0.22	0.76		0.71	1.99	1.67	2.46	0.8		2.13	9.51	1.46	0.21
10	1.07	0.72	7.78	0.26	1.9	0.97	0.44	0.11	0.96	0.75	0.93	1.77	2.71	1.86	0.45	0.53	0.6	0.42	0.53	1.81	2.69	0.39	0.38	0.57	2.97	1.23	2.97	0.13
20	0.94	0.78	6.84	0.44	3.02	11.28	0.34	0.64	0.75	0.93	1.42	0.15		7.49	0.48	0.13	0.71	0.66	1.1	2.13	20.79	2.6	0.13	1.25	1.06	0.89	3.11	0.25
30	0.47		0.65	3.31	0.41	0.25	1.55	1.45	0.39	1.6	1.23	0.35		4.01	1.58	0.21	0.13	9.83	10.42	0.49	1.81		0.32			0.53	8.7	0.19
40	0.62		12.78	5.37	0.53	0.44	0.12	2.69		1.36	1.3	1.02		1.32		0.26	0.27	0.12	0.17	0.25	1.08	2.01	33.29		8.41	0.35	2.68	0.4
50	1.09	40.64	21.79	2.11	1.2	0.55	0.62	0.1	2.45	0.41	2.17	1.96	2.98	13.08	0.34	0.25	0.37	0.67	0.24	0.32		1.21	14.51	23.54	1.67	1.18		50.86
60	1.34		5.25	0.51		1.15		1.21	1.17	0.62	0.74	0.54	0.63	12.1		0.45	0.76		0.34	0.38	20.4	0.47	0.17		1.65	0.44
B-LF
Time (min)	NSFA							NSAP							SDFA							SDAP
0	0.44	0.04	9.89	0.35	0.22	0.13	0.1	0.08	0.67	0.7	0.6	0.77	0.35	2.78	1.33	0.17	0.05		0.48	2.45	0.51	0.85	0.71		1.33	0.49	1.97	0.02
10	0.24	0.07	2.56	0.26	0.54	0.15	0.08	0.07	1.43	0.7	0.7	0.47	7.61	1.08	0.14	0.12	0.11	0.3	0.39	1.16	0.65	0.13	0.05	0.3	0.71	0.56	1.12	0.02
20	1.21	0.03	1.53	0.29	1.05	7.16	0.23	0.35	0.33	0.49	0.33	0.13		3.52	0.49	0.06	1.74	0.61	0.81	0.94	11.03	2.3	0.05	2.63	0.23	0.23	0.51	0.03
30	0.21		0.45	0.66	0.12	0.05	1.91	1.89	0.19	1.61	0.23	0.82		7.51	1.29	0.22	0.03	3.29	4.04	0.54	0.36		0.09			0.48	0.2	0.22
40	0.07		11.02	0.46	0.46	0.12	0.03	2.58		0.49	0.93	0.52		1.19		0.04	0.27	0.07	0.32	0.38	0.47	1.47	16.84		6.67	0.03	4.32	0.09
50	0.25	30.67	8.93	0.58	2.57	0.39	0.42	0.03	1.44	0.18	0.55	2.44	2.53	6.67	0.2	0.03	0.18	0.89	0.26	0.35		1.04	7.21	4.22	0.4	0.43		14.71
60	0.99		1.44	0.61		0.36		4.12	0.42	1.12	1.37	0.13	1.48	6.49		0.17	0.22		0.83	0.12	6.97	0.33	0.12		0.33	0.09
C-LF/HF
Time (min)	NSFA							NSAP							SDFA							SDAP
0	0.28	0.12	0.32	0.23	0.38	0.15	0.19	0.48	0.55	0.99	0.31	0.23	0.28	1.35	0.56	0.81	0.07		0.67	1.23	0.31	0.35	0.89		0.63	0.05	1.35	0.12
10	0.23	0.09	0.33	1	0.28	0.15	0.17	0.62	1.49	0.94	0.75	0.26	2.81	0.58	0.32	0.23	0.18	0.71	0.73	0.64	0.24	0.34	0.14	0.53	0.24	0.46	0.38	0.16
20	1.28	0.04	0.22	0.66	0.35	0.63	0.67	0.55	0.43	0.53	0.23	0.9		0.47	1.01	0.45	2.46	0.92	0.74	0.44	0.53	0.89	0.36	2.1	0.22	0.25	0.17	0.13
30	0.44		0.69	0.2	0.3	0.2	1.24	1.31	0.48	1	0.19	2.36		1.87	0.82	1.05	0.26	0.33	0.39	1.12	0.2		0.29			0.9	0.02	1.12
40	0.11		0.86	0.09	0.86	0.27	0.28	0.96		0.36	0.72	0.5		0.9		0.15	1	0.57	1.92	1.54	0.43	0.73	0.51		0.79	0.08	1.61	0.22
50	0.23	0.75	0.41	0.27	2.14	0.72	0.67	0.33	0.59	0.45	0.25	1.25	0.85	0.51	0.59	0.13	0.48	1.33	1.05	1.12		0.87	0.5	0.18	0.24	0.36		0.29
60	0.74		0.27	1.18		0.32		3.4	0.36	1.82	1.85	0.23	2.34	0.54		0.37	0.3		2.42	0.32	0.34	0.7	0.69		0.2	0.22

[truncated: 3 more sheets: Fig S7&S8 day 8 HRV , Fig S9&10, Fig S11]
